# Supplementary material for: A Compartmentalized Mathematical Model of the β1-Adrenergic Signaling System in Mouse Ventricular Myocytes
Source: PubMed Central journal article supplement (PMC3931689; doi:10.1371/journal.pone.0089113), 2014-02-21
Supplement: pone.0089113.s001.pdf [file pone.0089113.s001.pdf]

## APPENDIX S1. MODEL EQUATIONS AND PARAMETERS.

### BIOCHEMICAL PART

#### Cell compartments

| Parameter  | Definition               | Value                                       | Reference              |
|------------|--------------------------|---------------------------------------------|------------------------|
| $A_{cap}$  | Capacitive membrane area | $1.534 \times 10^{-4} \text{ cm}^2$         | Bondarenko et al. [25] |
| $V^{cell}$ | Cell volume              | $38.00 \times 10^{-6} \text{ } \mu\text{l}$ | Bondarenko et al. [25] |
| $V^{cyt}$  | Cytosolic volume         | $25.84 \times 10^{-6} \text{ } \mu\text{l}$ | Bondarenko et al. [25] |
| $V_{JSR}$  | Junctional SR volume     | $0.12 \times 10^{-6} \text{ } \mu\text{l}$  | Bondarenko et al. [25] |
| $V_{NSR}$  | Network SR volume        | $2.098 \times 10^{-6} \text{ } \mu\text{l}$ | Bondarenko et al. [25] |
| $V_{ss}$   | Subspace volume          | $1.485 \times 10^{-9} \text{ } \mu\text{l}$ | Bondarenko et al. [25] |
| $V^{cav}$  | Caveolar volume          | $0.02 \times V^{cell}$                      | Heijman et al. [8]     |
| $V^{ecav}$ | Extracaveolar volume     | $0.04 \times V^{cell}$                      | Heijman et al. [8]     |

#### The protein P concentrations in the cell ( $[P]^{cell}$ ), caveolae, extracaveolae, and cytosol

$$[P]^{cav} = f_p^{cav} \cdot [P]^{cell} \cdot \frac{V^{cell}}{V^{cav}} \quad (\text{A.1})$$

$$[P]^{ecav} = f_p^{ecav} \cdot [P]^{cell} \cdot \frac{V^{cell}}{V^{ecav}} \quad (\text{A.2})$$

$$[P]^{cyt} = (1 - f_p^{cav} - f_p^{ecav}) \cdot [P]^{cell} \cdot \frac{V^{cell}}{V^{cyt}} \quad (\text{A.3})$$

#### $\beta_1$ -adrenergic receptor module

| Parameter             | Definition                                                    | Value                                                            | Reference                                   |
|-----------------------|---------------------------------------------------------------|------------------------------------------------------------------|---------------------------------------------|
| $[L]$                 | Ligand concentration                                          | $0 \dots 100 \text{ } \mu\text{M}$                               |                                             |
| $[R_{\beta_1}]_{tot}$ | Total $\beta_1$ -adrenoceptor concentration                   | $0.0103 \text{ } \mu\text{M}$                                    | Hilal-Dandan et al. [29]                    |
| $f_{\beta_1}^{cav}$   | Fraction of $\beta_1$ -adrenoceptors located in caveolae      | 0.01                                                             | Rybin et al. [20]<br>Balijepali et al. [19] |
| $f_{\beta_1}^{ecav}$  | Fraction of $\beta_1$ -adrenoceptors located in extracaveolae | 0.5                                                              | Rybin et al. [20]<br>Balijepali et al. [19] |
| $f_{\beta_1}^{cyt}$   | Fraction of $\beta_1$ -adrenoceptors located in cytosol       | $f_{\beta_1}^{cyt} = 1 - f_{\beta_1}^{cav} - f_{\beta_1}^{ecav}$ | Rybin et al. [20]<br>Balijepali et al. [19] |
| $[G_s]_{tot}$         | Total concentration of $G_s$ protein                          | $2.054 \text{ } \mu\text{M}$                                     | Post et al. [41]                            |
| $f_{G_s}^{cav}$       | Fraction of $G_s$ protein located in caveolae                 | 0.4                                                              | Rybin et al. [20]                           |
| $f_{G_s}^{ecav}$      | Fraction of $G_s$ protein located in extracaveolae            | 0.4                                                              | Rybin et al. [20]                           |

|                 |                                                                     |                                                      |                       |
|-----------------|---------------------------------------------------------------------|------------------------------------------------------|-----------------------|
| $f_{G_s}^{cyt}$ | Fraction of $G_s$ protein located in cytosol                        | $f_{G_s}^{cyt} = 1 - f_{G_s}^{cav} - f_{G_s}^{ecav}$ |                       |
| $K_{\beta_1,L}$ | Low affinity constant of $\beta_1$ -adrenoceptor for isoproterenol  | 0.567 $\mu\text{M}$                                  | Heijman et al. [8]    |
| $K_{\beta_1,H}$ | High affinity constant of $\beta_1$ -adrenoceptor for isoproterenol | 0.0617 $\mu\text{M}$                                 | Heijman et al. [8]    |
| $K_{\beta_1,C}$ | Affinity constant of $\beta_1$ -adrenoceptor for $G_s$ protein      | 2.86 $\mu\text{M}$                                   | This paper            |
| $k_{PKA+}$      | Rate of PKA phosphorylation of $\beta_1$ -adrenoceptor              | 0.00081 $\mu\text{M}^{-1} \text{s}^{-1}$             | Freedman et al. [32]  |
| $k_{PKA-}$      | Rate of PKA dephosphorylation of $\beta_1$ -adrenoceptor            | 0.0002025 $\text{s}^{-1}$                            | This paper            |
| $k_{GRK2+}$     | Rate of GRK2 phosphorylation of $\beta_1$ -adrenoceptor             | 0.000243 $\text{s}^{-1}$                             | This paper            |
| $k_{GRK2-}$     | Rate of GRK2 dephosphorylation of $\beta_1$ -adrenoceptor           | $k_{PKA-}$                                           | This paper            |
| $k_{act1,G_s}$  | Activation rate for $G_s$ by high affinity complex                  | 4.9 $\text{s}^{-1}$                                  | Heijman et al. [8]    |
| $k_{act2,G_s}$  | Activation rate for $G_s$ by low affinity complex                   | 0.26 $\text{s}^{-1}$                                 | Heijman et al. [8]    |
| $k_{hyd,G_s}$   | Hydrolysis rate of $G_{s\alpha\text{-GTP}}$                         | 0.8 $\text{s}^{-1}$                                  | Saucerman et al. [10] |
| $k_{reas,G_s}$  | Re-association rate for $G_s$                                       | 1200 $\mu\text{M}^{-1} \text{s}^{-1}$                | Saucerman et al. [10] |

### Caveolae

$$[R_{\beta_1}]_{tot}^{cav} = f_{\beta_1}^{cav} \cdot [R_{\beta_1}]_{tot} \cdot \frac{V_{cell}}{V_{cav}} \quad (\text{A.4})$$

$$[G_s]_{\alpha\beta\gamma}^{cav} = f_{G_s}^{cav} \cdot [G_s]_{tot} \cdot \frac{V_{cell}}{V_{cav}} - [G_s]_{\alpha,GTP}^{cav} - [G_s]_{\alpha,GDP}^{cav} \quad (\text{A.5})$$

$$[R_{\beta_1}]_{np,tot}^{cav} = [R_{\beta_1}]_{tot}^{cav} - [R_{\beta_1}]_{PKA,tot}^{cav} - [R_{\beta_1}]_{GRK2,tot}^{cav} \quad (\text{A.6})$$

$$a_{\beta_1}^{cav} = \frac{1}{K_{\beta_1,L}} \cdot (K_{\beta_1,L} + [L]) \cdot (K_{\beta_1,H} + [L]) \quad (\text{A.7})$$

$$b_{\beta_1}^{cav} = [G_s]_{\alpha\beta\gamma}^{cav} \cdot (K_{\beta_1,H} + [L]) - [R_{\beta_1}]_{np,tot}^{cav} \cdot (K_{\beta_1,H} + [L]) + K_{\beta_1,C} \cdot K_{\beta_1,H} \left( 1 + \frac{[L]}{K_{\beta_1,L}} \right) \quad (\text{A.8})$$

$$c_{\beta_1}^{cav} = -[R_{\beta_1}]_{np,tot}^{cav} \cdot K_{\beta_1,C} \cdot K_{\beta_1,H} \quad (\text{A.9})$$

$$[R_{\beta_1}]_{np,f}^{cav} = \frac{-b_{\beta_1}^{cav} + \sqrt{[b_{\beta_1}^{cav}]^2 - 4 \cdot a_{\beta_1}^{cav} \cdot c_{\beta_1}^{cav}}}{2 \cdot a_{\beta_1}^{cav}} \quad (\text{A.10})$$

$$[G_s]_f^{cav} = \frac{[G_s]_{\alpha\beta\gamma}^{cav}}{1 + [R_{\beta 1}]_{np,f}^{cav} \left( \frac{1}{K_{\beta 1,C}} + \frac{[L]}{K_{\beta 1,C} \cdot K_{\beta 1,H}} \right)} \quad (\text{A.11})$$

$$[LR_{\beta 1}]_{np}^{cav} = \frac{[L] \cdot [R_{\beta 1}]_{np,f}^{cav}}{K_{\beta 1,L}} \quad (\text{A.12})$$

$$[R_{\beta 1}G_s]_{np}^{cav} = \frac{[R_{\beta 1}]_{np,f}^{cav} \cdot [G_s]_f^{cav}}{K_{\beta 1,C}} \quad (\text{A.13})$$

$$[LR_{\beta 1}G_s]_{np}^{cav} = \frac{[L] \cdot [R_{\beta 1}]_{np,f}^{cav} \cdot [G_s]_f^{cav}}{K_{\beta 1,C} \cdot K_{\beta 1,H}} \quad (\text{A.14})$$

$$\frac{d[R_{\beta 1}]_{PKA,tot}^{cav}}{dt} = k_{PKA+} \cdot [C]^{cav} \cdot [R_{\beta 1}]_{np,tot}^{cav} - k_{PKA-} \cdot [R_{\beta 1}]_{PKA,tot}^{cav} \quad (\text{A.15})$$

$$\frac{d[R_{\beta 1}]_{GRK2,tot}^{cav}}{dt} = k_{GRK2+} \cdot ([LR_{\beta 1}]_{np}^{cav} + [LR_{\beta 1}G_s]_{np}^{cav}) - k_{GRK2-} \cdot [R_{\beta 1}]_{GRK2,tot}^{cav} \quad (\text{A.16})$$

$$\frac{d[G_s]_{\alpha,GTP}^{cav}}{dt} = k_{act2,Gs} \cdot [R_{\beta 1}G_s]_{np}^{cav} + k_{act1,Gs} \cdot [LR_{\beta 1}G_s]_{np}^{cav} - k_{hyd,Gs} \cdot [G_s]_{\alpha,GTP}^{cav} \quad (\text{A.17})$$

$$\frac{d[G_s]_{\beta\gamma}^{cav}}{dt} = k_{act2,Gs} \cdot [R_{\beta 1}G_s]_{np}^{cav} + k_{act1,Gs} \cdot [LR_{\beta 1}G_s]_{np}^{cav} - k_{reas,Gs} \cdot [G_s]_{\beta\gamma}^{cav} \cdot [G_s]_{\alpha,GDP}^{cav} \quad (\text{A.18})$$

$$\frac{d[G_s]_{\alpha,GDP}^{cav}}{dt} = k_{hyd,Gs} \cdot [G_s]_{\alpha,GTP}^{cav} - k_{reas,Gs} \cdot [G_s]_{\beta\gamma}^{cav} \cdot [G_s]_{\alpha,GDP}^{cav} \quad (\text{A.19})$$

### Extracaveolae

$$[R_{\beta 1}]_{tot}^{ecav} = f_{\beta 1}^{ecav} \cdot [R_{\beta 1}]_{tot} \cdot \frac{V_{cell}}{V_{ecav}} \quad (\text{A.20})$$

$$[G_s]_{\alpha\beta\gamma}^{ecav} = f_{Gs}^{ecav} \cdot [G_s]_{tot} \cdot \frac{V_{cell}}{V_{ecav}} - [G_s]_{\alpha,GTP}^{ecav} - [G_s]_{\alpha,GDP}^{ecav} \quad (\text{A.21})$$

$$[R_{\beta 1}]_{np,tot}^{ecav} = [R_{\beta 1}]_{tot}^{ecav} - [R_{\beta 1}]_{PKA,tot}^{ecav} - [R_{\beta 1}]_{GRK2,tot}^{ecav} \quad (\text{A.22})$$

$$a_{\beta 1}^{ecav} = \frac{1}{K_{\beta 1,L}} \cdot (K_{\beta 1,L} + [L]) \cdot (K_{\beta 1,H} + [L]) \quad (\text{A.23})$$

$$b_{\beta 1}^{ecav} = [G_s]_{\alpha\beta\gamma}^{ecav} \cdot (K_{\beta 1,H} + [L]) - [R_{\beta 1}]_{np,tot}^{ecav} \cdot (K_{\beta 1,H} + [L]) + K_{\beta 1,C} \cdot K_{\beta 1,H} \left( 1 + \frac{[L]}{K_{\beta 1,L}} \right) \quad (\text{A.24})$$

$$c_{\beta 1}^{ecav} = -[R_{\beta 1}]_{np,tot}^{ecav} \cdot K_{\beta 1,C} \cdot K_{\beta 1,H} \quad (\text{A.25})$$

$$[R_{\beta 1}]_{np,f}^{ecav} = \frac{-b_{\beta 1}^{ecav} + \sqrt{[b_{\beta 1}^{ecav}]^2 - 4 \cdot a_{\beta 1}^{ecav} \cdot c_{\beta 1}^{ecav}}}{2 \cdot a_{\beta 1}^{ecav}} \quad (\text{A.26})$$

$$[G_s]_f^{ecav} = \frac{[G_s]_{\alpha,\beta\gamma}^{ecav}}{1 + [R_{\beta 1}]_{np,f}^{ecav} \left( \frac{1}{K_{\beta 1,C}} + \frac{[L]}{K_{\beta 1,C} \cdot K_{\beta 1,H}} \right)} \quad (\text{A.27})$$

$$[LR_{\beta 1}]_{np}^{ecav} = \frac{[L] \cdot [R_{\beta 1}]_{np,f}^{ecav}}{K_{\beta 1,L}} \quad (\text{A.28})$$

$$[R_{\beta 1}G_s]_{np}^{ecav} = \frac{[R_{\beta 1}]_{np,f}^{ecav} \cdot [G_s]_f^{ecav}}{K_{\beta 1,C}} \quad (\text{A.29})$$

$$[LR_{\beta 1}G_s]_{np}^{ecav} = \frac{[L] \cdot [R_{\beta 1}]_{np,f}^{ecav} \cdot [G_s]_f^{ecav}}{K_{\beta 1,C} \cdot K_{\beta 1,H}} \quad (\text{A.30})$$

$$\frac{d[R_{\beta 1}]_{PKA,tot}^{ecav}}{dt} = k_{PKA+} \cdot [C]^{ecav} \cdot [R_{\beta 1}]_{np,tot}^{ecav} - k_{PKA-} \cdot [R_{\beta 1}]_{PKA,tot}^{ecav} \quad (\text{A.31})$$

$$\frac{d[R_{\beta 1}]_{GRK2,tot}^{ecav}}{dt} = k_{GRK2+} \cdot ([LR_{\beta 1}]_{np}^{ecav} + [LR_{\beta 1}G_s]_{np}^{ecav}) - k_{GRK2-} \cdot [R_{\beta 1}]_{GRK2,tot}^{ecav} \quad (\text{A.32})$$

$$\frac{d[G_s]_{\alpha,GTP}^{ecav}}{dt} = k_{act2,Gs} \cdot [R_{\beta 1}G_s]_{np}^{ecav} + k_{act1,Gs} \cdot [LR_{\beta 1}G_s]_{np}^{ecav} - k_{hyd,Gs} \cdot [G_s]_{\alpha,GTP}^{ecav} \quad (\text{A.33})$$

$$\frac{d[G_s]_{\beta\gamma}^{ecav}}{dt} = k_{act2,Gs} \cdot [R_{\beta 1}G_s]_{np}^{ecav} + k_{act1,Gs} \cdot [LR_{\beta 1}G_s]_{np}^{ecav} - k_{reas,Gs} \cdot [G_s]_{\beta\gamma}^{ecav} \cdot [G_s]_{\alpha,GDP}^{ecav} \quad (\text{A.34})$$

$$\frac{d[G_s]_{\alpha,GDP}^{ecav}}{dt} = k_{hyd,Gs} \cdot [G_s]_{\alpha,GTP}^{ecav} - k_{reas,Gs} \cdot [G_s]_{\beta\gamma}^{ecav} \cdot [G_s]_{\alpha,GDP}^{ecav} \quad (\text{A.35})$$

## Cytosol

$$[R_{\beta 1}]_{tot}^{cyt} = f_{\beta 1}^{cyt} \cdot [R_{\beta 1}]_{tot} \cdot \frac{V_{cell}}{V_{cyt}} \quad (\text{A.36})$$

$$[G_s]_{\alpha,\beta\gamma}^{cyt} = f_{Gs}^{cyt} \cdot [G_s]_{tot} \cdot \frac{V_{cell}}{V_{cyt}} - [G_s]_{\alpha,GTP}^{cyt} - [G_s]_{\alpha,GDP}^{cyt} \quad (\text{A.37})$$

$$[R_{\beta 1}]_{np,tot}^{cyt} = [R_{\beta 1}]_{tot}^{cyt} - [R_{\beta 1}]_{PKA,tot}^{cyt} - [R_{\beta 1}]_{GRK2,tot}^{cyt} \quad (\text{A.38})$$

$$a_{\beta 1}^{cvt} = \frac{1}{K_{\beta 1,L}} \cdot (K_{\beta 1,L} + [L]) \cdot (K_{\beta 1,H} + [L]) \quad (\text{A.39})$$

$$b_{\beta 1}^{cvt} = [G_s]_{\alpha\beta\gamma}^{cvt} \cdot (K_{\beta 1,H} + [L]) - [R_{\beta 1}]_{np,tot}^{cvt} \cdot (K_{\beta 1,H} + [L]) + K_{\beta 1,C} \cdot K_{\beta 1,H} \left( 1 + \frac{[L]}{K_{\beta 1,L}} \right) \quad (\text{A.40})$$

$$c_{\beta 1}^{cvt} = -[R_{\beta 1}]_{np,tot}^{cvt} \cdot K_{\beta 1,C} \cdot K_{\beta 1,H} \quad (\text{A.41})$$

$$[R_{\beta 1}]_{np,f}^{cvt} = \frac{-b_{\beta 1}^{cvt} + \sqrt{[b_{\beta 1}^{cvt}]^2 - 4 \cdot a_{\beta 1}^{cvt} \cdot c_{\beta 1}^{cvt}}}{2 \cdot a_{\beta 1}^{cvt}} \quad (\text{A.42})$$

$$[G_s]_f^{cvt} = \frac{[G_s]_{\alpha\beta\gamma}^{cvt}}{1 + [R_{\beta 1}]_{np,f}^{cvt} \left( \frac{1}{K_{\beta 1,C}} + \frac{[L]}{K_{\beta 1,C} \cdot K_{\beta 1,H}} \right)} \quad (\text{A.43})$$

$$[LR_{\beta 1}]_{np}^{cvt} = \frac{[L] \cdot [R_{\beta 1}]_{np,f}^{cvt}}{K_{\beta 1,L}} \quad (\text{A.44})$$

$$[R_{\beta 1} G_s]_{np}^{cvt} = \frac{[R_{\beta 1}]_{np,f}^{cvt} \cdot [G_s]_f^{cvt}}{K_{\beta 1,C}} \quad (\text{A.45})$$

$$[LR_{\beta 1} G_s]_{np}^{cvt} = \frac{[L] \cdot [R_{\beta 1}]_{np,f}^{cvt} \cdot [G_s]_f^{cvt}}{K_{\beta 1,C} \cdot K_{\beta 1,H}} \quad (\text{A.46})$$

$$\frac{d[R_{\beta 1}]_{PKA,tot}^{cvt}}{dt} = k_{PKA+} \cdot [C]^{cvt} \cdot [R_{\beta 1}]_{np,tot}^{cvt} - k_{PKA-} \cdot [R_{\beta 1}]_{PKA,tot}^{cvt} \quad (\text{A.47})$$

$$\frac{d[R_{\beta 1}]_{GRK2,tot}^{cvt}}{dt} = k_{GRK2+} \cdot ([LR_{\beta 1}]_{np}^{cvt} + [LR_{\beta 1} G_s]_{np}^{cvt}) - k_{GRK2-} \cdot [R_{\beta 1}]_{GRK2,tot}^{cvt} \quad (\text{A.48})$$

$$\frac{d[G_s]_{\alpha,GTP}^{cvt}}{dt} = k_{act2,Gs} \cdot [R_{\beta 1} G_s]_{np}^{cvt} + k_{act1,Gs} \cdot [LR_{\beta 1} G_s]_{np}^{cvt} - k_{hyd,Gs} \cdot [G_s]_{\alpha,GTP}^{cvt} \quad (\text{A.49})$$

$$\frac{d[G_s]_{\beta\gamma}^{cvt}}{dt} = k_{act2,Gs} \cdot [R_{\beta 1} G_s]_{np}^{cvt} + k_{act1,Gs} \cdot [LR_{\beta 1} G_s]_{np}^{cvt} - k_{reas,Gs} \cdot [G_s]_{\beta\gamma}^{cvt} \cdot [G_s]_{\alpha,GDP}^{cvt} \quad (\text{A.50})$$

$$\frac{d[G_s]_{\alpha,GDP}^{cvt}}{dt} = k_{hyd,Gs} \cdot [G_s]_{\alpha,GTP}^{cvt} - k_{reas,Gs} \cdot [G_s]_{\beta\gamma}^{cvt} \cdot [G_s]_{\alpha,GDP}^{cvt} \quad (\text{A.51})$$

## Adenylyl cyclase module

| Parameter                    | Definition                                                   | Value                   | Reference                   |
|------------------------------|--------------------------------------------------------------|-------------------------|-----------------------------|
| $K_{m,ATP}$                  | Adenylyl cyclase affinity for ATP                            | 340 $\mu\text{M}$       | This paper                  |
| $[ATP]$                      | ATP concentration                                            | 5000 $\mu\text{M}$      | Heijman et al. [8]          |
| $[AC]_{tot}$                 | Total cellular AC concentration                              | 0.02622 $\mu\text{M}$   | Post et al. [41]            |
| $f_{AC56,AC47}$              | Fraction of AC that is of type 5 or 6                        | 0.74                    | Heijman et al. [8]          |
| $f_{AC56}^{cav}$             | Fraction of AC5/6 located in caveolae                        | 0.0875                  | Heijman et al. [8]          |
| $f_{AC47}^{ecav}$            | Fraction of AC4/7 located in extracaveolae space             | 0.1648                  | Heijman et al. [8]          |
| $K_{m,Gs\alpha}^{AC56}$      | AC5/6 affinity for $G_{s\alpha}$                             | 0.0852 $\mu\text{M}$    | Heijman et al. [8]          |
| $h_{AC56,Gs\alpha}$          | Hill coefficient for AC5/6 activation by $G_{s\alpha}$       | 1.357                   | Heijman et al. [8]          |
| $V_{G\beta\gamma}^{AC56}$    | Maximum amplification of AC5/6 by $G_{s\beta\gamma}$         | 1.430                   | Gao et al. [39]             |
| $K_{m,Gs\beta\gamma}^{AC56}$ | Affinity constant for $G_{s\beta\gamma}$ modulation of AC5/6 | 0.003793 $\mu\text{M}$  | Gao et al. [39]             |
| $h_{AC56,Gs\beta\gamma}$     | Hill coefficient for $G_{s\beta\gamma}$ modulation of AC5/6  | 1.0842                  | Gao et al. [39]             |
| $AC56_{basal}$               | Basal AC5/6 activity                                         | 0.0377                  | Heijman et al. [8]          |
| $AF_{56}$                    | Amplification factor for AC5/6                               | 51.1335 $\text{s}^{-1}$ | This paper                  |
| $K_{m,Gs\alpha}^{AC47}$      | AC4/7 affinity for $G_{s\alpha}$                             | 0.05008 $\mu\text{M}$   | Zimmermann and Taussig [40] |
| $h_{AC47,Gs\alpha}$          | Hill coefficient for AC4/7 activation by $G_{s\alpha}$       | 1.1657                  | Zimmermann and Taussig [40] |
| $V_{G\beta\gamma}^{AC47}$    | Maximum amplification of AC4/7 by $G_{s\beta\gamma}$         | 1.3500                  | Zimmermann and Taussig [40] |
| $K_{m,Gs\beta\gamma}^{AC47}$ | Affinity constant for $G_{s\beta\gamma}$ modulation of AC4/7 | 0.004466 $\mu\text{M}$  | Zimmermann and Taussig [40] |
| $h_{AC47,Gs\beta\gamma}$     | Hill coefficient for $G_{s\beta\gamma}$ modulation of AC4/7  | 0.8700                  | Zimmermann and Taussig [40] |
| $AC47_{basal}$               | Basal AC4/7 activity                                         | 0.04725                 | This paper                  |
| $AF_{47}$                    | Amplification factor for AC4/7                               | 9.283 $\text{s}^{-1}$   | This paper                  |

## Caveolae

$$[AC56]^{cav} = f_{AC56}^{cav} \cdot f_{AC56,AC47} \cdot [AC]_{tot} \cdot \frac{V_{cell}}{V_{cav}} \quad (\text{A.52})$$

$$k_{AC56}^{cav} = AF_{56} \cdot \left( AC56_{basal} + \frac{([G_s]_{\alpha,GTP}^{cav})^{h_{AC56,Gs\alpha}}}{K_{m,Gs\alpha}^{AC56} + ([G_s]_{\alpha,GTP}^{cav})^{h_{AC56,Gs\alpha}}} \right) \cdot \left( 1 + \frac{V_{G\beta\gamma}^{AC56} \cdot ([G_s]_{\beta\gamma}^{cav})^{h_{AC56,Gs\beta\gamma}}}{K_{m,Gs\beta\gamma}^{AC56} + ([G_s]_{\beta\gamma}^{cav})^{h_{AC56,Gs\beta\gamma}}} \right) \quad (\text{A.53})$$

$$\frac{d[cAMP]_{AC56}^{cav}}{dt} = k_{AC56}^{cav} \cdot \frac{[AC56]^{cav} \cdot [ATP]}{K_{m,ATP} + [ATP]} \quad (\text{A.54})$$

### Extracaveolae

$$[AC47]^{ecav} = f_{AC47}^{ecav} \cdot (1 - f_{AC56,AC47}) \cdot [AC]_{tot} \cdot \frac{V_{cell}}{V_{ecav}} \quad (\text{A.55})$$

$$k_{AC47}^{ecav} = AF_{47} \cdot \left( AC47_{basal} + \frac{([G_s]_{\alpha,GTP}^{ecav})^{h_{AC47,Gs\alpha}}}{K_{m,Gs\alpha}^{AC47} + ([G_s]_{\alpha,GTP}^{ecav})^{h_{AC47,Gs\alpha}}} \right) \cdot \left( 1 + \frac{V_{G\beta\gamma}^{AC47} \cdot ([G_s]_{\beta\gamma}^{ecav})^{h_{AC47,Gs\beta\gamma}}}{K_{m,Gs\beta\gamma}^{AC47} + ([G_s]_{\beta\gamma}^{ecav})^{h_{AC47,Gs\beta\gamma}}} \right) \quad (\text{A.56})$$

$$\frac{d[cAMP]_{AC47}^{ecav}}{dt} = k_{AC47}^{ecav} \cdot \frac{[AC47]^{ecav} \cdot [ATP]}{K_{m,ATP} + [ATP]} \quad (\text{A.57})$$

### Cytosol

$$[AC56]^{cyt} = (1 - f_{AC56}^{ecav}) \cdot f_{AC56,AC47} \cdot [AC]_{tot} \cdot \frac{V_{cell}}{V_{cyt}} \quad (\text{A.58})$$

$$[AC47]^{cyt} = (1 - f_{AC47}^{ecav}) \cdot (1 - f_{AC56,AC47}) \cdot [AC]_{tot} \cdot \frac{V_{cell}}{V_{cyt}} \quad (\text{A.59})$$

$$k_{AC56}^{cyt} = AF_{56} \cdot \left( AC56_{basal} + \frac{([G_s]_{\alpha,GTP}^{cyt})^{h_{AC56,Gs\alpha}}}{K_{m,Gs\alpha}^{AC56} + ([G_s]_{\alpha,GTP}^{cyt})^{h_{AC56,Gs\alpha}}} \right) \cdot \left( 1 + \frac{V_{G\beta\gamma}^{AC56} \cdot ([G_s]_{\beta\gamma}^{cyt})^{h_{AC56,Gs\beta\gamma}}}{K_{m,Gs\beta\gamma}^{AC56} + ([G_s]_{\beta\gamma}^{cyt})^{h_{AC56,Gs\beta\gamma}}} \right) \quad (\text{A.60})$$

$$\frac{d[cAMP]_{AC56}^{cyt}}{dt} = k_{AC56}^{cyt} \cdot \frac{[AC56]^{cyt} \cdot [ATP]}{K_{m,ATP} + [ATP]} \quad (\text{A.61})$$

$$k_{AC47}^{cyt} = AF_{47} \cdot \left( AC47_{basal} + \frac{([G_s]_{\alpha,GTP}^{cyt})^{h_{AC47,Gs\alpha}}}{K_{m,Gs\alpha}^{AC47} + ([G_s]_{\alpha,GTP}^{cyt})^{h_{AC47,Gs\alpha}}} \right) \cdot \left( 1 + \frac{V_{G\beta\gamma}^{AC47} \cdot ([G_s]_{\beta\gamma}^{cyt})^{h_{AC47,Gs\beta\gamma}}}{K_{m,Gs\beta\gamma}^{AC47} + ([G_s]_{\beta\gamma}^{cyt})^{h_{AC47,Gs\beta\gamma}}} \right) \quad (\text{A.62})$$

$$\frac{d[cAMP]_{AC47}^{cyt}}{dt} = k_{AC47}^{cyt} \cdot \frac{[AC47]^{cyt} \cdot [ATP]}{K_{m,ATP} + [ATP]} \quad (\text{A.63})$$

## Phosphodiesterase module

| Parameter            | Definition                                                | Value                                   | Reference            |
|----------------------|-----------------------------------------------------------|-----------------------------------------|----------------------|
| $[IBMX]$             | Concentration of IBMX                                     | 0...100 $\mu\text{M}$                   |                      |
| $h_{IBMX,PDE2}$      | Hill coefficient for inhibition of PDE2 by IBMX           | 1.000                                   | This paper           |
| $K_{PDE2}^{IBMX}$    | Affinity of IBMX for PDE2                                 | 29.50 $\mu\text{M}$                     | This paper           |
| $h_{IBMX,PDE3}$      | Hill coefficient for inhibition of PDE3 by IBMX           | 1.000                                   | This paper           |
| $K_{PDE3}^{IBMX}$    | Affinity of IBMX for PDE3                                 | 5.100 $\mu\text{M}$                     | This paper           |
| $h_{IBMX,PDE4}$      | Hill coefficient for inhibition of PDE4 by IBMX           | 1.000                                   | This paper           |
| $K_{PDE4}^{IBMX}$    | Affinity of IBMX for PDE4                                 | 16.200 $\mu\text{M}$                    | This paper           |
| $k_{f,PDEp}$         | Rate of phosphorylation of PDE3/4 by PKA                  | 0.0196 $\mu\text{M}^{-1} \text{s}^{-1}$ | Heijman et al. [8]   |
| $k_{b,PDEp}$         | Rate of dephosphorylation of PDE3/4 by PKA                | 0.0102 $\text{s}^{-1}$                  | Heijman et al. [8]   |
| $\Delta_{k,PDE3/4}$  | Increase in PDE3/4 activity after phosphorylation         | 3.0                                     | Heijman et al. [8]   |
| $k_{PDE2}$           | Rate of cAMP hydrolysis by PDE2                           | 20 $\text{s}^{-1}$                      | Iancu et al. [14]    |
| $K_{m,PDE2}$         | Affinity of PDE2 for cAMP                                 | 33 $\mu\text{M}$                        | Bode et al. [45]     |
| $k_{PDE3}$           | Rate of cAMP hydrolysis by PDE3                           | 2.5 $\text{s}^{-1}$                     | Heijman et al. [8]   |
| $K_{m,PDE3}$         | Affinity of PDE3 for cAMP                                 | 0.44 $\mu\text{M}$                      | Bode et al. [45]     |
| $k_{PDE4}$           | Rate of cAMP hydrolysis by PDE4                           | 3.5 $\text{s}^{-1}$                     | This paper           |
| $K_{m,PDE4}$         | Affinity of PDE4 for cAMP                                 | 1.4 $\mu\text{M}$                       | This paper           |
| $f_{PDE,part}$       | Fraction of total PDE located in the particulate fraction | 0.2                                     | Osadchii [47]        |
| $r_{part,PDE2,PDE3}$ | Ratio of PDE2 and PDE3 activities in particulate fraction | 0.570                                   | Mongillo et al. [48] |
| $r_{part,PDE3,PDE4}$ | Ratio of PDE3 and PDE4 activities in particulate fraction | 0.748                                   | Mongillo et al. [48] |
| $[PDE2]_{tot}$       | Total cellular concentration of PDE2                      | 0.034610 $\mu\text{M}$                  | This paper           |
| $[PDE3]_{tot}$       | Total cellular concentration of PDE3                      | 0.010346 $\mu\text{M}$                  | This paper           |
| $[PDE4]_{tot}$       | Total cellular concentration of PDE4                      | 0.026687 $\mu\text{M}$                  | This paper           |
| $f_{PDE2}^{cav}$     | Fraction of PDE2 located in caveolae                      | 0.06608                                 | This paper           |
| $f_{PDE2}^{ecav}$    | Fraction of PDE2 located in extracaveolae                 | $2 \cdot f_{PDE2}^{cav}$                | This paper           |
| $f_{PDE2}^{cyt}$     | Fraction of PDE2 located in cytosol                       | $1 - f_{PDE2}^{cav} - f_{PDE2}^{ecav}$  | This paper           |
| $f_{PDE3}^{cav}$     | Fraction of PDE3 located in caveolae                      | 0.29814                                 | This paper           |
| $f_{PDE3}^{ecav}$    | Fraction of PDE3 located in extracaveolae                 | 0.0                                     | This paper           |
| $f_{PDE3}^{cyt}$     | Fraction of PDE3 located in cytosol                       | $1 - f_{PDE3}^{cav} - f_{PDE3}^{ecav}$  | This paper           |
| $f_{PDE4}^{cav}$     | Fraction of PDE4 located in caveolae                      | 0.05366                                 | This paper           |



|                   |                                           |                                        |            |
|-------------------|-------------------------------------------|----------------------------------------|------------|
| $f_{PDE4}^{ecav}$ | Fraction of PDE4 located in extracaveolae | $2 \cdot f_{PDE4}^{cav}$               | This paper |
| $f_{PDE4}^{cvt}$  | Fraction of PDE4 located in cytosol       | $1 - f_{PDE4}^{cav} - f_{PDE4}^{ecav}$ | This paper |

### Caveolae

$$[PDE2]_{tot}^{cav} = \left( 1 - \frac{[IBMX]^{h_{IBMX,PDE2}}}{K_{m,PDE2}^{IBMX} + [IBMX]^{h_{IBMX,PDE2}}} \right) \cdot f_{PDE2}^{cav} \cdot [PDE2]_{tot} \cdot \frac{V^{cell}}{V^{cav}} \quad (\text{A.64})$$

$$[PDE3]_{tot}^{cav} = \left( 1 - \frac{[IBMX]^{h_{IBMX,PDE3}}}{K_{m,PDE3}^{IBMX} + [IBMX]^{h_{IBMX,PDE3}}} \right) \cdot f_{PDE3}^{cav} \cdot [PDE3]_{tot} \cdot \frac{V^{cell}}{V^{cav}} \quad (\text{A.65})$$

$$[PDE4]_{tot}^{cav} = \left( 1 - \frac{[IBMX]^{h_{IBMX,PDE4}}}{K_{m,PDE4}^{IBMX} + [IBMX]^{h_{IBMX,PDE4}}} \right) \cdot f_{PDE4}^{cav} \cdot [PDE4]_{tot} \cdot \frac{V^{cell}}{V^{cav}} \quad (\text{A.66})$$

$$\frac{d[PDE3]_p^{cav}}{dt} = k_{f,PDEp} \cdot [C]^{cav} \cdot ([PDE3]_{tot}^{cav} - [PDE3]_p^{cav}) - k_{b,PDEp} \cdot [PDE3]_p^{cav} \quad (\text{A.67})$$

$$\frac{d[PDE4]_p^{cav}}{dt} = k_{f,PDEp} \cdot [C]^{cav} \cdot ([PDE4]_{tot}^{cav} - [PDE4]_p^{cav}) - k_{b,PDEp} \cdot [PDE4]_p^{cav} \quad (\text{A.68})$$

$$\frac{d[cAMP]_{PDE2}^{cav}}{dt} = \frac{k_{PDE2} \cdot [PDE2]_{tot}^{cav} \cdot [cAMP]^{cav}}{K_{m,PDE2} + [cAMP]^{cav}} \quad (\text{A.69})$$

$$\frac{d[cAMP]_{PDE3}^{cav}}{dt} = \frac{k_{PDE3} \cdot ([PDE3]_{tot}^{cav} - [PDE3]_p^{cav}) \cdot [cAMP]^{cav} + \Delta_{k,PDE3/4} \cdot k_{PDE3} \cdot [PDE3]_p^{cav} \cdot [cAMP]^{cav}}{K_{m,PDE3} + [cAMP]^{cav}} \quad (\text{A.70})$$

$$\frac{d[cAMP]_{PDE4}^{cav}}{dt} = \frac{k_{PDE4} \cdot ([PDE4]_{tot}^{cav} - [PDE4]_p^{cav}) \cdot [cAMP]^{cav} + \Delta_{k,PDE3/4} \cdot k_{PDE4} \cdot [PDE4]_p^{cav} \cdot [cAMP]^{cav}}{K_{m,PDE4} + [cAMP]^{cav}} \quad (\text{A.71})$$

### Extracaveolae

$$[PDE2]_{tot}^{ecav} = \left( 1 - \frac{[IBMX]^{h_{IBMX,PDE2}}}{K_{m,PDE2}^{IBMX} + [IBMX]^{h_{IBMX,PDE2}}} \right) \cdot f_{PDE2}^{ecav} \cdot [PDE2]_{tot} \cdot \frac{V^{cell}}{V^{ecav}} \quad (\text{A.72})$$

$$[PDE4]_{tot}^{ecav} = \left( 1 - \frac{[IBMX]^{h_{IBMX,PDE4}}}{K_{m,PDE4}^{IBMX} + [IBMX]^{h_{IBMX,PDE4}}} \right) \cdot f_{PDE4}^{ecav} \cdot [PDE4]_{tot} \cdot \frac{V^{cell}}{V^{ecav}} \quad (\text{A.73})$$

$$\frac{d[PDE4]_p^{ecav}}{dt} = k_{f,PDEp} \cdot [C]^{ecav} \cdot ([PDE4]_{tot}^{ecav} - [PDE4]_p^{ecav}) - k_{b,PDEp} \cdot [PDE4]_p^{ecav} \quad (\text{A.74})$$

$$\frac{d[cAMP]_{PDE2}^{ecav}}{dt} = \frac{k_{PDE2} \cdot [PDE2]_{tot}^{ecav} \cdot [cAMP]^{ecav}}{K_{m,PDE2} + [cAMP]^{ecav}} \quad (\text{A.75})$$

$$\frac{d[cAMP]_{PDE4}^{ecav}}{dt} = \frac{k_{PDE4} \cdot ([PDE4]_{tot}^{ecav} - [PDE4]_p^{ecav}) \cdot [cAMP]^{ecav} + \Delta_{k,PDE3/4} \cdot k_{PDE4} \cdot [PDE4]_p^{ecav} \cdot [cAMP]^{ecav}}{K_{m,PDE4} + [cAMP]^{ecav}} \quad (\text{A.76})$$

## Cytosol

$$[PDE2]_{tot}^{cyt} = \left( 1 - \frac{[IBMX]^{h_{IBMX,PDE2}}}{K_{m,PDE2}^{IBMX} + [IBMX]^{h_{IBMX,PDE2}}} \right) \cdot f_{PDE2}^{cyt} \cdot [PDE2]_{tot} \cdot \frac{V^{cell}}{V^{cyt}} \quad (A.77)$$

$$[PDE3]_{tot}^{cyt} = \left( 1 - \frac{[IBMX]^{h_{IBMX,PDE3}}}{K_{m,PDE3}^{IBMX} + [IBMX]^{h_{IBMX,PDE3}}} \right) \cdot f_{PDE3}^{cyt} \cdot [PDE3]_{tot} \cdot \frac{V^{cell}}{V^{cyt}} \quad (A.78)$$

$$[PDE4]_{tot}^{cyt} = \left( 1 - \frac{[IBMX]^{h_{IBMX,PDE4}}}{K_{m,PDE4}^{IBMX} + [IBMX]^{h_{IBMX,PDE4}}} \right) \cdot f_{PDE4}^{cyt} \cdot [PDE4]_{tot} \cdot \frac{V^{cell}}{V^{cyt}} \quad (A.79)$$

$$\frac{d[PDE3]_p^{cyt}}{dt} = k_{f,PDEp} \cdot [C]^{cyt} \cdot ([PDE3]_{tot}^{cyt} - [PDE3]_p^{cyt}) - k_{b,PDEp} \cdot [PDE3]_p^{cyt} \quad (A.80)$$

$$\frac{d[PDE4]_p^{cyt}}{dt} = k_{f,PDEp} \cdot [C]^{cyt} \cdot ([PDE4]_{tot}^{cyt} - [PDE4]_p^{cyt}) - k_{b,PDEp} \cdot [PDE4]_p^{cyt} \quad (A.81)$$

$$\frac{d[cAMP]_{PDE2}^{cyt}}{dt} = \frac{k_{PDE2} \cdot [PDE2]_{tot}^{cyt} \cdot [cAMP]^{cyt}}{K_{m,PDE2} + [cAMP]^{cyt}} \quad (A.82)$$

$$\frac{d[cAMP]_{PDE3}^{cyt}}{dt} = \frac{k_{PDE3} \cdot ([PDE3]_{tot}^{cyt} - [PDE3]_p^{cyt}) \cdot [cAMP]^{cyt} + \Delta_{k,PDE3/4} \cdot k_{PDE3} \cdot [PDE3]_p^{cyt} \cdot [cAMP]^{cyt}}{K_{m,PDE3} + [cAMP]^{cyt}} \quad (A.83)$$

$$\frac{d[cAMP]_{PDE4}^{cyt}}{dt} = \frac{k_{PDE4} \cdot ([PDE4]_{tot}^{cyt} - [PDE4]_p^{cyt}) \cdot [cAMP]^{cyt} + \Delta_{k,PDE3/4} \cdot k_{PDE4} \cdot [PDE4]_p^{cyt} \cdot [cAMP]^{cyt}}{K_{m,PDE4} + [cAMP]^{cyt}} \quad (A.84)$$

## cAMP-PKA module

| Parameter        | Definition                                        | Value                                | Reference                                             |
|------------------|---------------------------------------------------|--------------------------------------|-------------------------------------------------------|
| $[PKA]_{tot}$    | Total cellular concentration of PKA holoenzyme    | 0.5176 $\mu\text{M}$                 | Corbin et al., J Biol Chem 252: 3854-3861, 1977 [149] |
| $f_{PKA}^{cav}$  | Fraction of PKA located in caveolae               | 0.08                                 | This paper                                            |
| $f_{PKA}^{ecav}$ | Fraction of PKA located in extracaveolae          | 0.20                                 | This paper                                            |
| $f_{PKA}^{cyt}$  | Fraction of PKA located in cytosol                | $1 - f_{PKA}^{cav} - f_{PKA}^{ecav}$ |                                                       |
| $[PKI]_{tot}$    | Total cellular concentration of PKA inhibitor     | $2 \cdot 0.2 \cdot [PKA]_{tot}$      | Beavo et al. [54]                                     |
| $f_{PKI}^{cav}$  | Fraction of PKI located in caveolae               | $f_{PKA}^{cav}$                      |                                                       |
| $f_{PKI}^{ecav}$ | Fraction of PKI located in extracaveolae          | $f_{PKA}^{ecav}$                     |                                                       |
| $f_{PKI}^{cyt}$  | Fraction of PKI located in cytosol                | $f_{PKA}^{cyt}$                      |                                                       |
| $k_{PKAI,f1}$    | Forward rate for binding of the first cAMP to PKA | 5.6 $\mu\text{M}^{-1} \text{s}^{-1}$ | This paper                                            |

|                |                                                            |                                     |                    |
|----------------|------------------------------------------------------------|-------------------------------------|--------------------|
| $K_{PKAI,1}$   | Equilibrium value for the binding of the first cAMP to PKA | 2.9 $\mu\text{M}$                   | Dao et al. [55]    |
| $k_{PKAI,f2}$  | Forward rate for binding of the second cAMP to PKA         | $k_{PKAI,f1}$                       | This paper         |
| $K_{PKAI,2}$   | Equilibrium value for binding of the second cAMP to PKA    | 2.9 $\mu\text{M}$                   | Dao et al. [55]    |
| $k_{PKAI,f3}$  | Forward rate for dissociation of C subunit                 | 2.6 $\text{s}^{-1}$                 | This paper         |
| $K_{PKAI,3}$   | Equilibrium value for dissociation of C subunit            | 1.3 $\mu\text{M}$                   | This paper         |
| $k_{PKI,f}$    | Forward rate for inhibition of C subunit by PKI            | 50 $\mu\text{M}^{-1} \text{s}^{-1}$ | Heijman et al. [8] |
| $K_{PKI}$      | Equilibrium value for inhibition of C subunit by PKI       | 2.6 $\cdot 10^{-4} \mu\text{M}$     | This paper         |
| $k_{PKAII,f1}$ | Forward rate for binding of the first cAMP to PKA          | $k_{PKAI,f1}$                       | Heijman et al. [8] |
| $K_{PKAII,1}$  | Equilibrium value for the binding of the first cAMP to PKA | 2.5 $\mu\text{M}$                   | Heijman et al. [8] |
| $k_{PKAII,f2}$ | Forward rate for binding of the second cAMP to PKA         | $k_{PKAI,f1}$                       | Heijman et al. [8] |
| $K_{PKAII,2}$  | Equilibrium value for binding of the second cAMP to PKA    | 2.5 $\mu\text{M}$                   | Heijman et al. [8] |
| $k_{PKAII,f3}$ | Forward rate for dissociation of C subunit                 | $k_{PKAI,f3}$                       | This paper         |
| $K_{PKAII,3}$  | Equilibrium value for dissociation of C subunit            | $K_{PKAI,3}$                        | This paper         |

### Caveolae

$$[PKA]^{cav} = f_{PKA}^{cav} \cdot [PKA]_{tot} \cdot \frac{V^{cell}}{V^{cav}} \quad (\text{A.85})$$

$$[RC]_f^{cav} = 2 \cdot [PKA]^{cav} - [ARC]^{cav} - [A_2RC]^{cav} - [A_2R]^{cav} \quad (\text{A.86})$$

$$[PKI]_f^{cav} = f_{PKI}^{cav} \cdot [PKI]_{tot} \cdot \frac{V^{cell}}{V^{cav}} - [PKIC]^{cav} \quad (\text{A.87})$$

$$k_{PKAII,b1} = k_{PKAII,f1} \cdot K_{PKAII,1} \quad (\text{A.88})$$

$$k_{PKAII,b2} = k_{PKAII,f2} \cdot K_{PKAII,2} \quad (\text{A.89})$$

$$k_{PKAII,b3} = k_{PKAII,f3} / K_{PKAII,3} \quad (\text{A.90})$$

$$k_{PKI,b} = k_{PKI,f} \cdot K_{PKI} \quad (\text{A.91})$$

$$\begin{aligned} \frac{d[cAMP]_{PKA}^{cav}}{dt} = & -k_{PKAII,f1} \cdot [RC]_f^{cav} \cdot [cAMP]^{cav} + k_{PKAII,b1} \cdot [ARC]^{cav} - k_{PKAII,f2} \cdot [ARC]^{cav} \cdot [cAMP]^{cav} \\ & + k_{PKAII,b2} \cdot [A_2RC]^{cav} \end{aligned} \quad (\text{A.92})$$

$$\begin{aligned} \frac{d[ARC]^{cav}}{dt} &= k_{PKAII,f1} \cdot [RC]_f^{cav} \cdot [cAMP]^{cav} - k_{PKAII,b1} \cdot [ARC]^{cav} - k_{PKAII,f2} \cdot [ARC]^{cav} \cdot [cAMP]^{cav} \\ &+ k_{PKAII,b2} \cdot [A_2RC]^{cav} \end{aligned} \quad (A.93)$$

$$\begin{aligned} \frac{d[A_2RC]^{cav}}{dt} &= k_{PKAII,f2} \cdot [ARC]^{cav} \cdot [cAMP]^{cav} - (k_{PKAII,b2} + k_{PKAII,f3}) \cdot [A_2RC]^{cav} \\ &+ k_{PKAII,b3} \cdot [A_2R]^{cav} \cdot [C]^{cav} \end{aligned} \quad (A.94)$$

$$\frac{d[A_2R]^{cav}}{dt} = k_{PKAII,f3} \cdot [A_2RC]^{cav} - k_{PKAII,b3} \cdot [A_2R]^{cav} \cdot [C]^{cav} \quad (A.95)$$

$$\frac{d[C]^{cav}}{dt} = k_{PKAII,f3} \cdot [A_2RC]^{cav} - k_{PKAII,b3} \cdot [A_2R]^{cav} \cdot [C]^{cav} + k_{PKI,b} \cdot [PKIC]^{cav} - k_{PKI,f} \cdot [PKI]_f^{cav} \cdot [C]^{cav} \quad (A.96)$$

$$\frac{d[PKIC]^{cav}}{dt} = -k_{PKI,b} \cdot [PKIC]^{cav} + k_{PKI,f} \cdot [PKI]_f^{cav} \cdot [C]^{cav} \quad (A.97)$$

### Extracaveolae

$$[PKA]^{ecav} = f_{PKA}^{ecav} \cdot [PKA]_{tot} \cdot \frac{V^{cell}}{V^{ecav}} \quad (A.98)$$

$$[RC]_f^{ecav} = 2 \cdot [PKA]^{ecav} - [ARC]^{ecav} - [A_2RC]^{ecav} - [A_2R]^{ecav} \quad (A.99)$$

$$[PKI]_f^{ecav} = f_{PKI}^{ecav} \cdot [PKI]_{tot} \cdot \frac{V^{cell}}{V^{ecav}} - [PKIC]^{ecav} \quad (A.100)$$

$$k_{PKAII,b1} = k_{PKAII,f1} \cdot K_{PKAII,1} \quad (A.101)$$

$$k_{PKAII,b2} = k_{PKAII,f2} \cdot K_{PKAII,2} \quad (A.102)$$

$$k_{PKAII,b3} = k_{PKAII,f3} / K_{PKAII,3} \quad (A.103)$$

$$k_{PKI,b} = k_{PKI,f} \cdot K_{PKI} \quad (A.104)$$

$$\begin{aligned} \frac{d[cAMP]_{PKA}^{ecav}}{dt} &= -k_{PKAII,f1} \cdot [RC]_f^{ecav} \cdot [cAMP]^{ecav} + k_{PKAII,b1} \cdot [ARC]^{ecav} - k_{PKAII,f2} \cdot [ARC]^{ecav} \cdot [cAMP]^{ecav} \\ &+ k_{PKAII,b2} \cdot [A_2RC]^{ecav} \end{aligned} \quad (A.105)$$

$$\begin{aligned} \frac{d[ARC]^{ecav}}{dt} &= k_{PKAII,f1} \cdot [RC]_f^{ecav} \cdot [cAMP]^{ecav} - k_{PKAII,b1} \cdot [ARC]^{ecav} - k_{PKAII,f2} \cdot [ARC]^{ecav} \cdot [cAMP]^{ecav} \\ &+ k_{PKAII,b2} \cdot [A_2RC]^{ecav} \end{aligned} \quad (A.106)$$

$$\begin{aligned} \frac{d[A_2RC]^{ecav}}{dt} &= k_{PKAII,f2} \cdot [ARC]^{ecav} \cdot [cAMP]^{ecav} - (k_{PKAII,b2} + k_{PKAII,f3}) \cdot [A_2RC]^{ecav} \\ &+ k_{PKAII,b3} \cdot [A_2R]^{ecav} \cdot [C]^{ecav} \end{aligned} \quad (A.107)$$

$$\frac{d[A_2R]^{ecav}}{dt} = k_{PKAII,f3} \cdot [A_2RC]^{ecav} - k_{PKAII,b3} \cdot [A_2R]^{ecav} \cdot [C]^{ecav} \quad (A.108)$$

$$\frac{d[C]^{ecav}}{dt} = k_{PKAI,f3} \cdot [A_2RC]^{ecav} - k_{PKAI,b3} \cdot [A_2R]^{ecav} \cdot [C]^{ecav} + k_{PKI,b} \cdot [PKIC]^{ecav} - k_{PKI,f} \cdot [PKI]_f^{ecav} \cdot [C]^{ecav} \quad (A.109)$$

$$\frac{d[PKIC]^{ecav}}{dt} = -k_{PKI,b} \cdot [PKIC]^{ecav} + k_{PKI,f} \cdot [PKI]_f^{ecav} \cdot [C]^{ecav} \quad (A.110)$$

## Cytosol

$$[PKA]^{cyt} = f_{PKA}^{cyt} \cdot [PKA]_{tot} \cdot \frac{V^{cell}}{V^{cyt}} \quad (A.111)$$

$$[RC]_f^{cyt} = 2 \cdot [PKA]^{cyt} - [ARC]^{cyt} - [A_2RC]^{cyt} - [A_2R]^{cyt} \quad (A.112)$$

$$[PKI]_f^{cyt} = f_{PKI}^{cyt} \cdot [PKI]_{tot} \cdot \frac{V^{cell}}{V^{cyt}} - [PKIC]^{cyt} \quad (A.113)$$

$$k_{PKAI,b1} = k_{PKAI,f1} \cdot K_{PKAI,1} \quad (A.114)$$

$$k_{PKAI,b2} = k_{PKAI,f2} \cdot K_{PKAI,2} \quad (A.115)$$

$$k_{PKAI,b3} = k_{PKAI,f3} / K_{PKAI,3} \quad (A.116)$$

$$k_{PKI,b} = k_{PKI,f} \cdot K_{PKI} \quad (A.117)$$

$$\begin{aligned} \frac{d[cAMP]_{PKA}^{cyt}}{dt} = & -k_{PKAI,f1} \cdot [RC]_f^{cyt} \cdot [cAMP]^{cyt} + k_{PKAI,b1} \cdot [ARC]^{cyt} - k_{PKAI,f2} \cdot [ARC]^{cyt} \cdot [cAMP]^{cyt} \\ & + k_{PKAI,b2} \cdot [A_2RC]^{cyt} \end{aligned} \quad (A.118)$$

$$\begin{aligned} \frac{d[ARC]^{cyt}}{dt} = & k_{PKAI,f1} \cdot [RC]_f^{cyt} \cdot [cAMP]^{cyt} - k_{PKAI,b1} \cdot [ARC]^{cyt} - k_{PKAI,f2} \cdot [ARC]^{cyt} \cdot [cAMP]^{cyt} \\ & + k_{PKAI,b2} \cdot [A_2RC]^{cyt} \end{aligned} \quad (A.119)$$

$$\frac{d[A_2RC]^{cyt}}{dt} = k_{PKAI,f2} \cdot [ARC]^{cyt} \cdot [cAMP]^{cyt} - (k_{PKAI,b2} + k_{PKAI,f3}) \cdot [A_2RC]^{cyt} + k_{PKAI,b3} \cdot [A_2R]^{cyt} \cdot [C]^{cyt} \quad (A.120)$$

$$\frac{d[A_2R]^{cyt}}{dt} = k_{PKAI,f3} \cdot [A_2RC]^{cyt} - k_{PKAI,b3} \cdot [A_2R]^{cyt} \cdot [C]^{cyt} \quad (A.121)$$

$$\frac{d[C]^{cyt}}{dt} = k_{PKAI,f3} \cdot [A_2RC]^{cyt} - k_{PKAI,b3} \cdot [A_2R]^{cyt} \cdot [C]^{cyt} + k_{PKI,b} \cdot [PKIC]^{cyt} - k_{PKI,f} \cdot [PKI]_f^{cyt} \cdot [C]^{cyt} \quad (A.122)$$

$$\frac{d[PKIC]^{cyt}}{dt} = -k_{PKI,b} \cdot [PKIC]^{cyt} + k_{PKI,f} \cdot [PKI]_f^{cyt} \cdot [C]^{cyt} \quad (A.123)$$

### Protein phosphatases and inhibitor-1 module

| Parameter              | Definition                                                                              | Value                                   | Reference               |
|------------------------|-----------------------------------------------------------------------------------------|-----------------------------------------|-------------------------|
| $[PP1]_{tot}^{cyt}$    | Total concentration of PP1 in the cytosolic compartment                                 | 0.2 $\mu\text{M}$                       | Heijman et al. [8]      |
| $[PP2A]^{cyt}$         | Cytosolic concentration of PP2A                                                         | 0.0607843 $\mu\text{M}$                 | This paper              |
| $[PP1]^{cav}$          | Concentration of PP1 in the caveolae compartment                                        | 0.1 $\mu\text{M}$                       | This paper              |
| $[PP2A]^{cav}$         | Concentration of PP2A in the caveolae compartment                                       | 0.1 $\mu\text{M}$                       | This paper              |
| $[PP]^{cav}$           | Total phosphatase concentration in caveolae compartment<br>$[PP1]^{cav} + [PP2A]^{cav}$ | 0.2 $\mu\text{M}$                       | This paper              |
| $[PP1]^{ecav}$         | Concentration of PP1 in the extracaveolae compartment                                   | 0.1 $\mu\text{M}$                       | Heijman et al. [8]      |
| $[Inhib1]_{tot}^{cyt}$ | Total concentration of inhibitor 1 in the cytosolic compartment                         | 0.08543 $\mu\text{M}$                   | El-Armouche et al. [65] |
| $K_{inhib1}$           | Affinity for PP1 – Inhibitor 1 binding                                                  | $1.0 \cdot 10^{-3}$ $\mu\text{M}$       | Saucerman et al. [10]   |
| $k_{PKA\_Inhib1}$      | Rate of phosphorylation of inhibitor 1 by PKA                                           | 1080.0 $\mu\text{M}^{-1} \text{s}^{-1}$ | This paper              |
| $K_{mPKA\_Inhib1}$     | Affinity of inhibitor 1 for PKA catalytic subunit                                       | 1.5 $\mu\text{M}$                       | This paper              |
| $k_{PP2A\_Inhib1}$     | Rate of dephosphorylation of inhibitor 1                                                | 50.67 $\mu\text{M}^{-1} \text{s}^{-1}$  | This paper              |
| $K_{mPP2A\_Inhib1}$    | Affinity for PP2A – Inhibitor 1 binding                                                 | $1.0 \cdot 10^{-3}$ $\mu\text{M}$       | This paper              |

$$[Inhib1]_f^{cyt} = [Inhib1]_{tot}^{cyt} - [Inhib1]_{p,tot}^{cyt} \quad (\text{A.124})$$

$$a_{Inhib1} = 1.0 \quad (\text{A.125})$$

$$b_{Inhib1} = K_{Inhib1} + [PP1]_{tot}^{cyt} - [Inhib1]_{p,tot}^{cyt} \quad (\text{A.126})$$

$$c_{Inhib1} = -[Inhib1]_{p,tot}^{cyt} \cdot K_{Inhib1} \quad (\text{A.127})$$

$$[Inhib1]_p^{cyt} = \frac{-b_{Inhib1} + \sqrt{[b_{Inhib1}]^2 - 4 \cdot a_{Inhib1} \cdot c_{Inhib1}}}{2 \cdot a_{Inhib1}} \quad (\text{A.128})$$

$$[PP1]_f^{cyt} = \frac{[PP1]_{tot}^{cyt} \cdot K_{Inhib1}}{K_{Inhib1} + [Inhib1]_p^{cyt}} \quad (\text{A.129})$$

$$\frac{d[Inhib1]_{p,tot}^{cyt}}{dt} = \frac{k_{PKA\_Inhib1} \cdot [C]^{cyt} \cdot [Inhib1]_f^{cyt}}{K_{mPKA\_Inhib1} + [Inhib1]_f^{cyt}} - \frac{k_{PP2A\_Inhib1} \cdot [PP2A]^{cyt} \cdot [Inhib1]_{p,tot}^{cyt}}{K_{mPP2A\_Inhib1} + [Inhib1]_{p,tot}^{cyt}} \quad (\text{A.130})$$

## cAMP fluxes

| Parameter      | Definition                                                              | Value                                    | Reference         |
|----------------|-------------------------------------------------------------------------|------------------------------------------|-------------------|
| $J_{cav/ecav}$ | Rate of cAMP diffusion between caveolae and extracaveolae compartments  | $5.000 \cdot 10^{-9} \mu\text{L s}^{-1}$ | Iancu et al. [14] |
| $J_{cav/cyt}$  | Rate of cAMP diffusion between caveolae and cytosolic compartments      | $7.500 \cdot 10^{-8} \mu\text{L s}^{-1}$ | Iancu et al. [14] |
| $J_{ecav/cyt}$ | Rate of cAMP diffusion between extracaveolae and cytosolic compartments | $9.000 \cdot 10^{-9} \mu\text{L s}^{-1}$ | Iancu et al. [14] |

$$\begin{aligned} \frac{d[cAMP]^{cav}}{dt} = & \frac{d[cAMP]_{PKA}^{cav}}{dt} + \frac{d[cAMP]_{AC56}^{cav}}{dt} - \frac{d[cAMP]_{PDE2}^{cav}}{dt} - \frac{d[cAMP]_{PDE3}^{cav}}{dt} - \frac{d[cAMP]_{PDE4}^{cav}}{dt} \\ & - J_{cav/ecav} \cdot \frac{[cAMP]^{cav} - [cAMP]^{ecav}}{V_{cav}} - J_{cav/cyt} \cdot \frac{[cAMP]^{cav} - [cAMP]^{cyt}}{V_{cav}} \end{aligned} \quad (\text{A.131})$$

$$\begin{aligned} \frac{d[cAMP]^{ecav}}{dt} = & \frac{d[cAMP]_{PKA}^{ecav}}{dt} + \frac{d[cAMP]_{AC47}^{ecav}}{dt} - \frac{d[cAMP]_{PDE2}^{ecav}}{dt} - \frac{d[cAMP]_{PDE4}^{ecav}}{dt} \\ & - J_{cav/ecav} \cdot \frac{[cAMP]^{ecav} - [cAMP]^{cav}}{V_{ecav}} - J_{ecav/cyt} \cdot \frac{[cAMP]^{ecav} - [cAMP]^{cyt}}{V_{ecav}} \end{aligned} \quad (\text{A.132})$$

$$\begin{aligned} \frac{d[cAMP]^{cyt}}{dt} = & \frac{d[cAMP]_{PKA}^{cyt}}{dt} + \frac{d[cAMP]_{AC56}^{cyt}}{dt} + \frac{d[cAMP]_{AC47}^{cyt}}{dt} - \frac{d[cAMP]_{PDE2}^{cyt}}{dt} - \frac{d[cAMP]_{PDE3}^{cyt}}{dt} - \frac{d[cAMP]_{PDE4}^{cyt}}{dt} \\ & - J_{cav/cyt} \cdot \frac{[cAMP]^{cyt} - [cAMP]^{cav}}{V_{cyt}} - J_{ecav/cyt} \cdot \frac{[cAMP]^{cyt} - [cAMP]^{ecav}}{V_{cyt}} \end{aligned} \quad (\text{A.133})$$

## ELECTROPHYSIOLOGICAL PART. PKA SUBSTRATES

### L-type $\text{Ca}^{2+}$ current module

| Parameter         | Definition                                                                             | Value                                | Reference                                |
|-------------------|----------------------------------------------------------------------------------------|--------------------------------------|------------------------------------------|
| $[I_{CaL}]_{tot}$ | Total cellular concentration of the L-type $\text{Ca}^{2+}$ channels                   | 0.0273 $\mu\text{M}$                 | Chu et al. [71]<br>Bers and Stiffel [72] |
| $f_{ICaL}^{cav}$  | Fraction of the L-type $\text{Ca}^{2+}$ channels located in caveolae                   | 0.2                                  | Scriven et al. [21]                      |
| $f_{ICaL}^{ecav}$ | Fraction of the L-type $\text{Ca}^{2+}$ channels located in extracaveolae              | $1 - f_{ICaL}^{cav}$                 | Scriven et al. [21]                      |
| $G_{CaL}$         | Specific maximum conductivity for L-type $\text{Ca}^{2+}$ channel (non-phosphorylated) | 0.3772 $\text{mS}/\mu\text{F}$       | This paper                               |
| $G_{CaLp}$        | Specific maximum conductivity for L-type $\text{Ca}^{2+}$ channel (phosphorylated)     | 0.7875 $\text{mS}/\mu\text{F}$       | This paper                               |
| $E_{CaL}$         | Reversal potential for L-type $\text{Ca}^{2+}$ channel                                 | 52.0 mV                              | Petkova-Kirova et al. [26]               |
| $K_{pc,max}$      | Maximum rate constant for $\text{Ca}^{2+}$ -induced inactivation                       | 233.24 $\text{s}^{-1}$               | This paper                               |
| $K_{pc,half}$     | Half-saturation constant for $\text{Ca}^{2+}$ -induced inactivation                    | 10.0 $\mu\text{M}$                   | This paper                               |
| $K_{pcf}$         | Forward voltage-insensitive rate constant for inactivation                             | 40,000 $\text{s}^{-1}$               | This paper                               |
| $K_{pcb}$         | Backward voltage-insensitive rate constant for inactivation                            | 2.4 $\text{s}^{-1}$                  | This paper                               |
| $k_{co}$          | Forward voltage-insensitive rate constant for activation (non-phosphorylated)          | 1,000 $\text{s}^{-1}$                | This paper                               |
| $k_{cop}$         | Forward voltage-insensitive rate constant for activation (phosphorylated)              | 4,000 $\text{s}^{-1}$                | This paper                               |
| $k_{oc}$          | Backward voltage-insensitive rate constant for activation                              | 1,000 $\text{s}^{-1}$                | This paper                               |
| $I_{CaL,max}$     | Normalization constant for L-type $\text{Ca}^{2+}$ current                             | 7.0 $\text{pA}/\text{pF}$            | Bondarenko et al. [25]                   |
| $k_{ICaL\_PKA}$   | Phosphorylation rate of the L-type $\text{Ca}^{2+}$ channel by PKA                     | $1.74 \cdot 10^{-2} \text{ s}^{-1}$  | This paper                               |
| $k_{ICaL\_PP}$    | Dephosphorylation rate of the L-type $\text{Ca}^{2+}$ channel by PP1 and PP2A          | $2.325 \cdot 10^{-4} \text{ s}^{-1}$ | This paper                               |
| $K_{ICaL\_PKA}$   | Affinity of the L-type $\text{Ca}^{2+}$ channel for PKA                                | 0.5 $\mu\text{M}$                    | This paper                               |
| $K_{ICaL\_PP}$    | Affinity of the L-type $\text{Ca}^{2+}$ channel for PP1 and PP2A                       | 0.2 $\mu\text{M}$                    | This paper                               |

$$I_{CaL} = I_{ICaL}^{cav} + I_{ICaL}^{ecav} \quad (\text{A.134})$$

$$\alpha = 0.4e^{(V+15.0)/15.0} \quad (\text{A.135})$$

$$\alpha_p = 0.4e^{(V+15.0+20.0)/15.0} \quad (\text{A.136})$$



$$\beta = 0.13e^{-(V+15.0)/18.0} \quad (\text{A.137})$$

### Caveolae

$$[I_{CaL}]_{tot}^{cav} = f_{ICaL}^{cav} [I_{CaL}]_{tot} \frac{V_{cell}}{V_{cav}} \quad (\text{A.138})$$

$$I_{CaL}^{cav} = f_{ICaL}^{cav} \cdot (G_{CaL} \cdot O^{cav} + G_{CaLp} \cdot O_p^{cav})(V - E_{CaL}) \quad (\text{A.139})$$

$$\gamma^{cav} = \frac{K_{pc,max} [Ca^{2+}]_i}{K_{pc,half} + [Ca^{2+}]_i} \quad (\text{A.140})$$

$$\begin{aligned} \frac{dO^{cav}}{dt} = & k_{co} C_p^{cav} - k_{oc} O^{cav} + K_{pcb} I_1^{cav} - \gamma^{cav} O^{cav} + 0.001(\alpha I_2^{cav} - K_{pcf} O^{cav}) \\ & - \frac{k_{ICaL\_PKA} [C]^{cav} O^{cav}}{K_{ICaL\_PKA} + [I_{CaL}]_{tot}^{cav} O^{cav}} + \frac{\alpha}{\alpha_p} \frac{k_{ICaL\_PP} [PP]^{cav} O_p^{cav}}{K_{ICaL\_PP} + [I_{CaL}]_{tot}^{cav} O_p^{cav}} \end{aligned} \quad (\text{A.141})$$

$$\begin{aligned} C_1^{cav} = & 1 - (O^{cav} + C_2^{cav} + C_3^{cav} + C_4^{cav} + C_p^{cav} + I_1^{cav} + I_2^{cav} + I_3^{cav} \\ & + O_p^{cav} + C_{1p}^{cav} + C_{2p}^{cav} + C_{3p}^{cav} + C_{4p}^{cav} + C_{pp}^{cav} + I_{1p}^{cav} + I_{2p}^{cav} + I_{3p}^{cav}) \end{aligned} \quad (\text{A.142})$$

$$\begin{aligned} \frac{dC_2^{cav}}{dt} = & 4\alpha C_1^{cav} - \beta C_2^{cav} + 2\beta C_3^{cav} - 3\alpha C_2^{cav} \\ & - \frac{k_{ICaL\_PKA} [C]^{cav} C_2^{cav}}{K_{ICaL\_PKA} + [I_{CaL}]_{tot}^{cav} C_2^{cav}} + \frac{\alpha_p^2 k_{cop}}{\alpha^2 k_{co}} \frac{k_{ICaL\_PP} [PP]^{cav} C_{2p}^{cav}}{K_{ICaL\_PP} + [I_{CaL}]_{tot}^{cav} C_{2p}^{cav}} \end{aligned} \quad (\text{A.143})$$

$$\begin{aligned} \frac{dC_3^{cav}}{dt} = & 3\alpha C_2^{cav} - 2\beta C_3^{cav} + 3\beta C_4^{cav} - 2\alpha C_3^{cav} \\ & - \frac{k_{ICaL\_PKA} [C]^{cav} C_3^{cav}}{K_{ICaL\_PKA} + [I_{CaL}]_{tot}^{cav} C_3^{cav}} + \frac{\alpha_p k_{cop}}{\alpha k_{co}} \frac{k_{ICaL\_PP} [PP]^{cav} C_{3p}^{cav}}{K_{ICaL\_PP} + [I_{CaL}]_{tot}^{cav} C_{3p}^{cav}} \end{aligned} \quad (\text{A.144})$$

$$\begin{aligned}
\frac{dC_4^{cav}}{dt} = & 2\alpha C_3^{cav} - 3\beta C_4^{cav} + 4\beta C_P^{cav} - \alpha C_4^{cav} + 0.01(4K_{pcb}\beta I_1^{cav} - \frac{k_{co}}{k_{oc}}\alpha\gamma^{cav}C_4^{cav}) \\
& + 0.002(4\beta I_2^{cav} - \frac{k_{co}}{k_{oc}}K_{pcf}C_4^{cav}) + 4\beta K_{pcb}I_3^{cav} - \frac{k_{co}}{k_{oc}}\gamma^{cav}K_{pcf}C_4^{cav} \\
& - \frac{k_{ICaL\_PKA}[C]^{cav}C_4^{cav}}{K_{ICaL\_PKA} + [I_{CaL}]_{tot}^{cav}C_4^{cav}} + \frac{k_{cop}}{k_{co}}\frac{k_{ICaL\_PP}[PP]^{cav}C_{4p}^{cav}}{K_{ICaL\_PP} + [I_{CaL}]_{tot}^{cav}C_{4p}^{cav}}
\end{aligned} \tag{A.145}$$

$$\begin{aligned}
\frac{dC_P^{cav}}{dt} = & \alpha C_4^{cav} - 4\beta C_P^{cav} + k_{oc}O^{cav} - k_{co}C_P^{cav} \\
& - \frac{k_{ICaL\_PKA}[C]^{cav}C_P^{cav}}{K_{ICaL\_PKA} + [I_{CaL}]_{tot}^{cav}C_P^{cav}} + \frac{\alpha k_{cop}}{\alpha_p k_{co}}\frac{k_{ICaL\_PP}[PP]^{cav}C_{Pp}^{cav}}{K_{ICaL\_PP} + [I_{CaL}]_{tot}^{cav}C_{Pp}^{cav}}
\end{aligned} \tag{A.146}$$

$$\begin{aligned}
\frac{dI_1^{cav}}{dt} = & \gamma^{cav}O^{cav} - K_{pcb}I_1^{cav} + 0.001(\alpha I_3^{cav} - K_{pcf}I_1^{cav}) + 0.01(\frac{k_{co}}{k_{oc}}\alpha\gamma^{cav}C_4^{cav} - 4\beta K_{pcb}I_1^{cav}) \\
& - \frac{k_{ICaL\_PKA}[C]^{cav}I_1^{cav}}{K_{ICaL\_PKA} + [I_{CaL}]_{tot}^{cav}I_1^{cav}} + \frac{\alpha}{\alpha_p}\frac{k_{ICaL\_PP}[PP]^{cav}I_{1p}^{cav}}{K_{ICaL\_PP} + [I_{CaL}]_{tot}^{cav}I_{1p}^{cav}}
\end{aligned} \tag{A.147}$$

$$\begin{aligned}
\frac{dI_2^{cav}}{dt} = & 0.001(K_{pcf}O^{cav} - \alpha I_2^{cav}) + K_{pcb}I_3^{cav} - \gamma^{cav}I_2^{cav} + 0.002(\frac{k_{co}}{k_{oc}}K_{pcf}C_4^{cav} - 4\beta I_2^{cav}) \\
& - \frac{k_{ICaL\_PKA}[C]^{cav}I_2^{cav}}{K_{ICaL\_PKA} + [I_{CaL}]_{tot}^{cav}I_2^{cav}} + \frac{k_{ICaL\_PP}[PP]^{cav}I_{2p}^{cav}}{K_{ICaL\_PP} + [I_{CaL}]_{tot}^{cav}I_{2p}^{cav}}
\end{aligned} \tag{A.148}$$

$$\begin{aligned}
\frac{dI_3^{cav}}{dt} = & 0.001(K_{pcf}I_1^{cav} - \alpha I_3^{cav}) + \gamma^{cav}I_2^{cav} - K_{pcb}I_3^{cav} + \frac{k_{co}}{k_{oc}}\gamma^{cav}K_{pcf}C_4^{cav} - 4\beta K_{pcb}I_3^{cav} \\
& - \frac{k_{ICaL\_PKA}[C]^{cav}I_3^{cav}}{K_{ICaL\_PKA} + [I_{CaL}]_{tot}^{cav}I_3^{cav}} + \frac{k_{ICaL\_PP}[PP]^{cav}I_{3p}^{cav}}{K_{ICaL\_PP} + [I_{CaL}]_{tot}^{cav}I_{3p}^{cav}}
\end{aligned} \tag{A.149}$$

$$\begin{aligned}
\frac{dO_p^{cav}}{dt} = & k_{cop}C_{Pp}^{cav} - k_{oc}O_p^{cav} + K_{pcb}I_{1p}^{cav} - \gamma^{cav}O_p^{cav} + 0.001(\alpha_p I_{2p}^{cav} - K_{pcf}O_p^{cav}) \\
& + \frac{k_{ICaL\_PKA}[C]^{cav}O_p^{cav}}{K_{ICaL\_PKA} + [I_{CaL}]_{tot}^{cav}O_p^{cav}} - \frac{\alpha}{\alpha_p}\frac{k_{ICaL\_PP}[PP]^{cav}O_p^{cav}}{K_{ICaL\_PP} + [I_{CaL}]_{tot}^{cav}O_p^{cav}}
\end{aligned} \tag{A.150}$$

$$\frac{dC_{1p}^{cav}}{dt} = \beta C_{2p}^{cav} - 4\alpha_p C_{1p}^{cav} + \frac{k_{ICaL\_PKA}[C]^{cav}C_1^{cav}}{K_{ICaL\_PKA} + [I_{CaL}]_{tot}^{cav}C_1^{cav}} - \frac{\alpha_p^3 k_{cop}}{\alpha^3 k_{co}}\frac{k_{ICaL\_PP}[PP]^{cav}C_{1p}^{cav}}{K_{ICaL\_PP} + [I_{CaL}]_{tot}^{cav}C_{1p}^{cav}} \tag{A.151}$$

$$\begin{aligned} \frac{dC_{2p}^{cav}}{dt} &= 4\alpha_p C_{1p}^{cav} - \beta C_{2p}^{cav} + 2\beta C_{3p}^{cav} - 3\alpha_p C_{2p}^{cav} \\ &+ \frac{k_{ICaL\_PKA}[C]^{cav} C_2^{cav}}{K_{ICaL\_PKA} + [I_{CaL}]_{tot}^{cav} C_2^{cav}} - \frac{\alpha_p^2 k_{cop}}{\alpha^2 k_{co}} \frac{k_{ICaL\_PP}[PP]^{cav} C_{2p}^{cav}}{K_{ICaL\_PP} + [I_{CaL}]_{tot}^{cav} C_{2p}^{cav}} \end{aligned} \quad (A.152)$$

$$\begin{aligned} \frac{dC_{3p}^{cav}}{dt} &= 3\alpha_p C_{2p}^{cav} - 2\beta C_{3p}^{cav} + 3\beta C_{4p}^{cav} - 2\alpha_p C_{3p}^{cav} \\ &+ \frac{k_{ICaL\_PKA}[C]^{cav} C_3^{cav}}{K_{ICaL\_PKA} + [I_{CaL}]_{tot}^{cav} C_3^{cav}} - \frac{\alpha_p k_{cop}}{\alpha k_{co}} \frac{k_{ICaL\_PP}[PP]^{cav} C_{3p}^{cav}}{K_{ICaL\_PP} + [I_{CaL}]_{tot}^{cav} C_{3p}^{cav}} \end{aligned} \quad (A.153)$$

$$\begin{aligned} \frac{dC_{4p}^{cav}}{dt} &= 2\alpha_p C_{3p}^{cav} - 3\beta C_{4p}^{cav} + 4\beta C_{pp}^{cav} - \alpha_p C_{4p}^{cav} + 0.01(4K_{pcb}\beta I_{1p}^{cav} - \frac{k_{cop}}{k_{oc}} \alpha \gamma^{cav} C_{4p}^{cav}) \\ &+ 0.002(4\beta I_{2p}^{cav} - \frac{k_{cop}}{k_{oc}} K_{pcf} C_{4p}^{cav}) + 4\beta K_{pcb} I_{3p}^{cav} - \frac{k_{cop}}{k_{oc}} \gamma^{cav} K_{pcf} C_{4p}^{cav} \\ &+ \frac{k_{ICaL\_PKA}[C]^{cav} C_4^{cav}}{K_{ICaL\_PKA} + [I_{CaL}]_{tot}^{cav} C_4^{cav}} - \frac{k_{cop}}{k_{co}} \frac{k_{ICaL\_PP}[PP]^{cav} C_{4p}^{cav}}{K_{ICaL\_PP} + [I_{CaL}]_{tot}^{cav} C_{4p}^{cav}} \end{aligned} \quad (A.154)$$

$$\begin{aligned} \frac{dC_{pp}^{cav}}{dt} &= \alpha_p C_{4p}^{cav} - 4\beta C_{pp}^{cav} + k_{oc} O_p^{cav} - k_{cop} C_{pp}^{cav} \\ &+ \frac{k_{ICaL\_PKA}[C]^{cav} C_P^{cav}}{K_{ICaL\_PKA} + [I_{CaL}]_{tot}^{cav} C_P^{cav}} - \frac{\alpha k_{cop}}{\alpha_p k_{co}} \frac{k_{ICaL\_PP}[PP]^{cav} C_{pp}^{cav}}{K_{ICaL\_PP} + [I_{CaL}]_{tot}^{cav} C_{pp}^{cav}} \end{aligned} \quad (A.155)$$

$$\begin{aligned} \frac{dI_{1p}^{cav}}{dt} &= \gamma^{cav} O_p^{cav} - K_{pcb} I_{1p}^{cav} + 0.001(\alpha_p I_{3p}^{cav} - K_{pcf} I_{1p}^{cav}) + 0.01(\frac{k_{cop}}{k_{oc}} \alpha_p \gamma^{cav} C_{4p}^{cav} - 4\beta K_{pcb} I_{1p}^{cav}) \\ &+ \frac{k_{ICaL\_PKA}[C]^{cav} I_1^{cav}}{K_{ICaL\_PKA} + [I_{CaL}]_{tot}^{cav} I_1^{cav}} - \frac{\alpha}{\alpha_p} \frac{k_{ICaL\_PP}[PP]^{cav} I_{1p}^{cav}}{K_{ICaL\_PP} + [I_{CaL}]_{tot}^{cav} I_{1p}^{cav}} \end{aligned} \quad (A.156)$$

$$\begin{aligned} \frac{dI_{2p}^{cav}}{dt} &= 0.001(K_{pcf} O_p^{cav} - \alpha_p I_{2p}^{cav}) + K_{pcb} I_{3p}^{cav} - \gamma^{cav} I_{2p}^{cav} + 0.002(\frac{k_{cop}}{k_{oc}} K_{pcf} C_{4p}^{cav} - 4\beta I_{2p}^{cav}) \\ &+ \frac{k_{ICaL\_PKA}[C]^{cav} I_2^{cav}}{K_{ICaL\_PKA} + [I_{CaL}]_{tot}^{cav} I_2^{cav}} - \frac{k_{ICaL\_PP}[PP]^{cav} I_{2p}^{cav}}{K_{ICaL\_PP} + [I_{CaL}]_{tot}^{cav} I_{2p}^{cav}} \end{aligned} \quad (A.157)$$

$$\begin{aligned} \frac{dI_{3p}^{cav}}{dt} = & 0.001(K_{pcf}I_{1p}^{cav} - \alpha_p I_{3p}^{cav}) + \gamma^{cav} I_{2p}^{cav} - K_{pcb}I_{3p}^{cav} + \frac{k_{cop}}{k_{oc}} \gamma^{cav} K_{pcf} C_{4p}^{cav} - 4\beta K_{pcb} I_{3p}^{cav} \\ & + \frac{k_{ICaL\_PKA} [C]^{cav} I_3^{cav}}{K_{ICaL\_PKA} + [I_{CaL}]_{tot}^{cav} I_3^{cav}} - \frac{k_{ICaL\_PP} [PP]^{cav} I_{3p}^{cav}}{K_{ICaL\_PP} + [I_{CaL}]_{tot}^{cav} I_{3p}^{cav}} \end{aligned} \quad (A.158)$$

### Extracaveolae

$$[I_{CaL}]_{tot}^{ecav} = f_{ICaL}^{ecav} [I_{CaL}]_{tot} \frac{V_{cell}}{V_{ecav}} \quad (A.159)$$

$$I_{CaL}^{ecav} = f_{ICaL}^{ecav} \cdot (G_{CaL} \cdot O^{ecav} + G_{CaLp} \cdot O_p^{ecav}) (V - E_{CaL}) \quad (A.160)$$

$$\gamma^{ecav} = \frac{K_{pc,max} [Ca^{2+}]_{ss}}{K_{pc,half} + [Ca^{2+}]_{ss}} \quad (A.161)$$

$$\begin{aligned} \frac{dO^{ecav}}{dt} = & k_{co} C_p^{ecav} - k_{oc} O^{ecav} + K_{pcb} I_1^{ecav} - \gamma^{ecav} O^{ecav} + 0.001(\alpha I_2^{ecav} - K_{pcf} O^{ecav}) \\ & - \frac{k_{ICaL\_PKA} [C]^{ecav} O^{ecav}}{K_{ICaL\_PKA} + [I_{CaL}]_{tot}^{ecav} O^{ecav}} + \frac{\alpha}{\alpha_p} \frac{k_{ICaL\_PP} [PP1]^{ecav} O_p^{ecav}}{K_{ICaL\_PP} + [I_{CaL}]_{tot}^{ecav} O_p^{ecav}} \end{aligned} \quad (A.162)$$

$$\begin{aligned} C_1^{ecav} = & 1 - (O^{ecav} + C_2^{ecav} + C_3^{ecav} + C_4^{ecav} + C_p^{ecav} + I_1^{ecav} + I_2^{ecav} + I_3^{ecav} \\ & + O_p^{ecav} + C_{1p}^{ecav} + C_{2p}^{ecav} + C_{3p}^{ecav} + C_{4p}^{ecav} + C_{pp}^{ecav} + I_{1p}^{ecav} + I_{2p}^{ecav} + I_{3p}^{ecav}) \end{aligned} \quad (A.163)$$

$$\begin{aligned} \frac{dC_2^{ecav}}{dt} = & 4\alpha C_1^{ecav} - \beta C_2^{ecav} + 2\beta C_3^{ecav} - 3\alpha C_2^{ecav} \\ & - \frac{k_{ICaL\_PKA} [C]^{ecav} C_2^{ecav}}{K_{ICaL\_PKA} + [I_{CaL}]_{tot}^{ecav} C_2^{ecav}} + \frac{\alpha^2 k_{cop}}{\alpha^2 k_{co}} \frac{k_{ICaL\_PP} [PP1]^{ecav} C_{2p}^{ecav}}{K_{ICaL\_PP} + [I_{CaL}]_{tot}^{ecav} C_{2p}^{ecav}} \end{aligned} \quad (A.164)$$

$$\begin{aligned} \frac{dC_3^{ecav}}{dt} = & 3\alpha C_2^{ecav} - 2\beta C_3^{ecav} + 3\beta C_4^{ecav} - 2\alpha C_3^{ecav} \\ & - \frac{k_{ICaL\_PKA} [C]^{ecav} C_3^{ecav}}{K_{ICaL\_PKA} + [I_{CaL}]_{tot}^{ecav} C_3^{ecav}} + \frac{\alpha_p k_{cop}}{\alpha k_{co}} \frac{k_{ICaL\_PP} [PP1]^{ecav} C_{3p}^{ecav}}{K_{ICaL\_PP} + [I_{CaL}]_{tot}^{ecav} C_{3p}^{ecav}} \end{aligned} \quad (A.165)$$

$$\begin{aligned}
\frac{dC_4^{ecav}}{dt} = & 2\alpha C_3^{ecav} - 3\beta C_4^{ecav} + 4\beta C_P^{ecav} - \alpha C_4^{ecav} + 0.01(4K_{pcb}\beta I_1^{ecav} - \frac{k_{co}}{k_{oc}}\alpha\gamma^{ecav}C_4^{ecav}) \\
& + 0.002(4\beta I_2^{ecav} - \frac{k_{co}}{k_{oc}}K_{pcf}C_4^{ecav}) + 4\beta K_{pcb}I_3^{ecav} - \frac{k_{co}}{k_{oc}}\gamma^{ecav}K_{pcf}C_4^{ecav} \\
& - \frac{k_{ICaL\_PKA}[C]^{ecav}C_4^{ecav}}{K_{ICaL\_PKA} + [I_{CaL}]_{tot}^{ecav}C_4^{ecav}} + \frac{k_{cop}}{k_{co}}\frac{k_{ICaL\_PP}[PP1]^{ecav}C_4^{ecav}}{K_{ICaL\_PP} + [I_{CaL}]_{tot}^{ecav}C_4^{ecav}}
\end{aligned} \tag{A.166}$$

$$\begin{aligned}
\frac{dC_P^{ecav}}{dt} = & \alpha C_4^{ecav} - 4\beta C_P^{ecav} + k_{oc}O^{ecav} - k_{co}C_P^{ecav} \\
& - \frac{k_{ICaL\_PKA}[C]^{ecav}C_P^{ecav}}{K_{ICaL\_PKA} + [I_{CaL}]_{tot}^{ecav}C_P^{ecav}} + \frac{\alpha k_{cop}}{\alpha_p k_{co}}\frac{k_{ICaL\_PP}[PP1]^{ecav}C_P^{ecav}}{K_{ICaL\_PP} + [I_{CaL}]_{tot}^{ecav}C_P^{ecav}}
\end{aligned} \tag{A.167}$$

$$\begin{aligned}
\frac{dI_1^{ecav}}{dt} = & \gamma^{ecav}O^{ecav} - K_{pcb}I_1^{ecav} + 0.001(\alpha I_3^{ecav} - K_{pcf}I_1^{ecav}) + 0.01(\frac{k_{co}}{k_{oc}}\alpha\gamma^{ecav}C_4^{ecav} - 4\beta K_{pcb}I_1^{ecav}) \\
& - \frac{k_{ICaL\_PKA}[C]^{ecav}I_1^{ecav}}{K_{ICaL\_PKA} + [I_{CaL}]_{tot}^{ecav}I_1^{ecav}} + \frac{\alpha}{\alpha_p}\frac{k_{ICaL\_PP}[PP1]^{ecav}I_1^{ecav}}{K_{ICaL\_PP} + [I_{CaL}]_{tot}^{ecav}I_1^{ecav}}
\end{aligned} \tag{A.168}$$

$$\begin{aligned}
\frac{dI_2^{ecav}}{dt} = & 0.001(K_{pcf}O^{ecav} - \alpha I_2^{ecav}) + K_{pcb}I_3^{ecav} - \gamma^{ecav}I_2^{ecav} + 0.002(\frac{k_{co}}{k_{oc}}K_{pcf}C_4^{ecav} - 4\beta I_2^{ecav}) \\
& - \frac{k_{ICaL\_PKA}[C]^{ecav}I_2^{ecav}}{K_{ICaL\_PKA} + [I_{CaL}]_{tot}^{ecav}I_2^{ecav}} + \frac{k_{ICaL\_PP}[PP1]^{ecav}I_2^{ecav}}{K_{ICaL\_PP} + [I_{CaL}]_{tot}^{ecav}I_2^{ecav}}
\end{aligned} \tag{A.169}$$

$$\begin{aligned}
\frac{dI_3^{ecav}}{dt} = & 0.001(K_{pcf}I_1^{ecav} - \alpha I_3^{ecav}) + \gamma^{ecav}I_2^{ecav} - K_{pcb}I_3^{ecav} + \frac{k_{co}}{k_{oc}}\gamma^{ecav}K_{pcf}C_4^{ecav} - 4\beta K_{pcb}I_3^{ecav} \\
& - \frac{k_{ICaL\_PKA}[C]^{ecav}I_3^{ecav}}{K_{ICaL\_PKA} + [I_{CaL}]_{tot}^{ecav}I_3^{ecav}} + \frac{k_{ICaL\_PP}[PP1]^{ecav}I_3^{ecav}}{K_{ICaL\_PP} + [I_{CaL}]_{tot}^{ecav}I_3^{ecav}}
\end{aligned} \tag{A.170}$$

$$\begin{aligned}
\frac{dO_p^{ecav}}{dt} = & k_{cop}C_{Pp}^{ecav} - k_{oc}O_p^{ecav} + K_{pcb}I_{1p}^{ecav} - \gamma^{ecav}O_p^{ecav} + 0.001(\alpha_p I_{2p}^{ecav} - K_{pcf}O_p^{ecav}) \\
& + \frac{k_{ICaL\_PKA}[C]^{ecav}O_p^{ecav}}{K_{ICaL\_PKA} + [I_{CaL}]_{tot}^{ecav}O_p^{ecav}} - \frac{\alpha}{\alpha_p}\frac{k_{ICaL\_PP}[PP1]^{ecav}O_p^{ecav}}{K_{ICaL\_PP} + [I_{CaL}]_{tot}^{ecav}O_p^{ecav}}
\end{aligned} \tag{A.171}$$

$$\frac{dC_{1p}^{ecav}}{dt} = \beta C_{2p}^{ecav} - 4\alpha_p C_{1p}^{ecav} + \frac{k_{ICaL\_PKA}[C]^{ecav}C_{1p}^{ecav}}{K_{ICaL\_PKA} + [I_{CaL}]_{tot}^{ecav}C_{1p}^{ecav}} - \frac{\alpha_p^3 k_{cop}}{\alpha^3 k_{co}}\frac{k_{ICaL\_PP}[PP1]^{ecav}C_{1p}^{ecav}}{K_{ICaL\_PP} + [I_{CaL}]_{tot}^{ecav}C_{1p}^{ecav}} \tag{A.172}$$

$$\begin{aligned} \frac{dC_{2p}^{ecav}}{dt} &= 4\alpha_p C_{1p}^{ecav} - \beta C_{2p}^{ecav} + 2\beta C_{3p}^{ecav} - 3\alpha_p C_{2p}^{ecav} \\ &+ \frac{k_{ICaL\_PKA}[C]^{ecav} C_2^{ecav}}{K_{ICaL\_PKA} + [I_{CaL}]_{tot}^{ecav} C_2^{ecav}} - \frac{\alpha_p^2 k_{cop}}{\alpha^2 k_{co}} \frac{k_{ICaL\_PP}[PPI]^{ecav} C_{2p}^{ecav}}{K_{ICaL\_PP} + [I_{CaL}]_{tot}^{ecav} C_{2p}^{ecav}} \end{aligned} \quad (A.173)$$

$$\begin{aligned} \frac{dC_{3p}^{ecav}}{dt} &= 3\alpha_p C_{2p}^{ecav} - 2\beta C_{3p}^{ecav} + 3\beta C_{4p}^{ecav} - 2\alpha_p C_{3p}^{ecav} \\ &+ \frac{k_{ICaL\_PKA}[C]^{ecav} C_3^{ecav}}{K_{ICaL\_PKA} + [I_{CaL}]_{tot}^{ecav} C_3^{ecav}} - \frac{\alpha_p k_{cop}}{\alpha k_{co}} \frac{k_{ICaL\_PP}[PPI]^{ecav} C_{3p}^{ecav}}{K_{ICaL\_PP} + [I_{CaL}]_{tot}^{ecav} C_{3p}^{ecav}} \end{aligned} \quad (A.174)$$

$$\begin{aligned} \frac{dC_{4p}^{ecav}}{dt} &= 2\alpha_p C_{3p}^{ecav} - 3\beta C_{4p}^{ecav} + 4\beta C_{Pp}^{ecav} - \alpha_p C_{4p}^{ecav} + 0.01(4K_{pcb}\beta I_{1p}^{ecav} - \frac{k_{cop}}{k_{oc}} \alpha \gamma^{ecav} C_{4p}^{ecav}) \\ &+ 0.002(4\beta I_{2p}^{ecav} - \frac{k_{cop}}{k_{oc}} K_{pcf} C_{4p}^{ecav}) + 4\beta K_{pcb} I_{3p}^{ecav} - \frac{k_{cop}}{k_{oc}} \gamma^{ecav} K_{pcf} C_{4p}^{ecav} \\ &+ \frac{k_{ICaL\_PKA}[C]^{ecav} C_4^{ecav}}{K_{ICaL\_PKA} + [I_{CaL}]_{tot}^{ecav} C_4^{ecav}} - \frac{k_{cop}}{k_{co}} \frac{k_{ICaL\_PP}[PPI]^{ecav} C_{4p}^{ecav}}{K_{ICaL\_PP} + [I_{CaL}]_{tot}^{ecav} C_{4p}^{ecav}} \end{aligned} \quad (A.175)$$

$$\begin{aligned} \frac{dC_{Pp}^{ecav}}{dt} &= \alpha_p C_{4p}^{ecav} - 4\beta C_{Pp}^{ecav} + k_{oc} O_p^{ecav} - k_{cop} C_{Pp}^{ecav} \\ &+ \frac{k_{ICaL\_PKA}[C]^{ecav} C_P^{ecav}}{K_{ICaL\_PKA} + [I_{CaL}]_{tot}^{ecav} C_P^{ecav}} - \frac{\alpha k_{cop}}{\alpha_p k_{co}} \frac{k_{ICaL\_PP}[PPI]^{ecav} C_{Pp}^{ecav}}{K_{ICaL\_PP} + [I_{CaL}]_{tot}^{ecav} C_{Pp}^{ecav}} \end{aligned} \quad (A.176)$$

$$\begin{aligned} \frac{dI_{1p}^{ecav}}{dt} &= \gamma^{ecav} O_p^{ecav} - K_{pcb} I_{1p}^{ecav} + 0.001(\alpha_p I_{3p}^{ecav} - K_{pcf} I_{1p}^{ecav}) + 0.01(\frac{k_{cop}}{k_{oc}} \alpha_p \gamma^{ecav} C_{4p}^{ecav} - 4\beta K_{pcb} I_{1p}^{ecav}) \\ &+ \frac{k_{ICaL\_PKA}[C]^{ecav} I_1^{ecav}}{K_{ICaL\_PKA} + [I_{CaL}]_{tot}^{ecav} I_1^{ecav}} - \frac{\alpha}{\alpha_p} \frac{k_{ICaL\_PP}[PPI]^{ecav} I_{1p}^{ecav}}{K_{ICaL\_PP} + [I_{CaL}]_{tot}^{ecav} I_{1p}^{ecav}} \end{aligned} \quad (A.177)$$

$$\begin{aligned} \frac{dI_{2p}^{ecav}}{dt} &= 0.001(K_{pcf} O_p^{ecav} - \alpha_p I_{2p}^{ecav}) + K_{pcb} I_{3p}^{ecav} - \gamma^{ecav} I_{2p}^{ecav} + 0.002(\frac{k_{cop}}{k_{oc}} K_{pcf} C_{4p}^{ecav} - 4\beta I_{2p}^{ecav}) \\ &+ \frac{k_{ICaL\_PKA}[C]^{ecav} I_2^{ecav}}{K_{ICaL\_PKA} + [I_{CaL}]_{tot}^{ecav} I_2^{ecav}} - \frac{k_{ICaL\_PP}[PPI]^{ecav} I_{2p}^{ecav}}{K_{ICaL\_PP} + [I_{CaL}]_{tot}^{ecav} I_{2p}^{ecav}} \end{aligned} \quad (A.178)$$

$$\begin{aligned} \frac{dI_{3p}^{ecav}}{dt} = & 0.001(K_{pcf}I_{1p}^{ecav} - \alpha_p I_{3p}^{ecav}) + \gamma^{ecav} I_{2p}^{ecav} - K_{pcb} I_{3p}^{ecav} + \frac{k_{cop}}{k_{oc}} \gamma^{ecav} K_{pcf} C_{4p}^{ecav} - 4\beta K_{pcb} I_{3p}^{ecav} \\ & + \frac{k_{ICaL\_PKA} [C]^{ecav} I_3^{ecav}}{K_{ICaL\_PKA} + [I_{CaL}]_{tot}^{ecav} I_3^{ecav}} - \frac{k_{ICaL\_PP} [PP1]^{ecav} I_{3p}^{ecav}}{K_{ICaL\_PP} + [I_{CaL}]_{tot}^{ecav} I_{3p}^{ecav}} \end{aligned} \quad (A.179)$$

### Fast Na<sup>+</sup> current module

| Parameter      | Definition                                                                              | Value                                                 | Reference  |
|----------------|-----------------------------------------------------------------------------------------|-------------------------------------------------------|------------|
| $G_{Na}$       | Specific maximum conductivity for the fast Na <sup>+</sup> channel (non-phosphorylated) | 14.4 mS/ $\mu$ F                                      | This paper |
| $G_{Nap}$      | Specific maximum conductivity for the fast Na <sup>+</sup> channel (phosphorylated)     | 18.0 mS/ $\mu$ F                                      | This paper |
| $k_{INa\_PKA}$ | Phosphorylation-trafficking rate of the fast Na <sup>+</sup> channel by PKA             | $6.8400 \cdot 10^{-3} \mu\text{M}^{-1} \text{s}^{-1}$ | This paper |
| $k_{INa\_PP}$  | Dephosphorylation rate of the fast Na <sup>+</sup> channel by PP1 and PP2A              | $1.9804 \cdot 10^{-2} \mu\text{M}^{-1} \text{s}^{-1}$ | This paper |
| $K_{INa\_PKA}$ | Affinity of the fast Na <sup>+</sup> channel for PKA                                    | $5.49415 \cdot 10^{-3}$                               | This paper |
| $K_{INa\_PP}$  | Affinity of the fast Na <sup>+</sup> channel for PP1 and PP2A                           | 0.393025                                              | This paper |

$$E_{Na} = \frac{RT}{F} \ln \left( \frac{0.9[Na^+]_o + 0.1[K^+]_o}{0.9[Na^+]_i + 0.1[K^+]_i} \right) \quad (A.180)$$

$$I_{Na} = (G_{Na} \cdot O_{Na} + G_{Nap} \cdot O_{Nap})(V - E_{Na}) \quad (A.181)$$

$$\begin{aligned} C_{Na3} = & 1 - (O_{Na} + C_{Na2} + C_{Na1} + IF_{Na} + I1_{Na} + I2_{Na} + IC_{Na2} + IC_{Na3} \\ & + O_{Nap} + C_{Na3p} + C_{Na2p} + C_{Na1p} + IF_{Nap} + I1_{Nap} + I2_{Nap} + IC_{Na2p} + IC_{Na3p}) \end{aligned} \quad (A.182)$$

$$\begin{aligned} \frac{dC_{Na2}}{dt} = & \alpha_{Na11} C_{Na3} - \beta_{Na11} C_{Na2} + \beta_{Na12} C_{Na1} - \alpha_{Na12} C_{Na2} + \alpha_{Na3} IC_{Na2} - \beta_{Na3} C_{Na2} \\ & - \frac{k_{INa\_PKA} [C]^{cav} C_{Na2}}{K_{INa\_PKA} + C_{Na2}} + \frac{k_{INa\_PP} [PP]^{cav} C_{Na2p}}{K_{INa\_PP} + C_{Na2p}} \end{aligned} \quad (A.183)$$

$$\begin{aligned} \frac{dC_{Na1}}{dt} &= \alpha_{Na12}C_{Na2} - \beta_{Na12}C_{Na1} + \beta_{Na13}O_{Na} - \alpha_{Na13}C_{Na1} + \alpha_{Na3}IF_{Na} - \beta_{Na3}C_{Na1} \\ &\quad - \frac{k_{INa\_PKA}[C]^{cav}C_{Na1}}{K_{INa\_PKA} + C_{Na1}} + \frac{k_{INa\_PP}[PP]^{cav}C_{Na1p}}{K_{INa\_PP} + C_{Na1p}} \end{aligned} \quad (A.184)$$

$$\begin{aligned} \frac{dO_{Na}}{dt} &= \alpha_{Na13}C_{Na1} - \beta_{Na13}O_{Na} + \beta_{Na2}IF_{Na} - \alpha_{Na2}O_{Na} \\ &\quad - \frac{k_{INa\_PKA}[C]^{cav}O_{Na}}{K_{INa\_PKA} + O_{Na}} + \frac{k_{INa\_PP}[PP]^{cav}O_{Nap}}{K_{INa\_PP} + O_{Nap}} \end{aligned} \quad (A.185)$$

$$\begin{aligned} \frac{dIF_{Na}}{dt} &= \alpha_{Na2}O_{Na} - \beta_{Na2}IF_{Na} + \beta_{Na3}C_{Na1} - \alpha_{Na3}IF_{Na} + \beta_{Na4}I1_{Na} - \alpha_{Na4}IF_{Na} \\ &\quad + \alpha_{Na12}IC_{Na2} - \beta_{Na12}IF_{Na} - \frac{k_{INa\_PKA}[C]^{cav}IF_{Na}}{K_{INa\_PKA} + IF_{Na}} + \frac{k_{INa\_PP}[PP]^{cav}IF_{Nap}}{K_{INa\_PP} + IF_{Nap}} \end{aligned} \quad (A.186)$$

$$\begin{aligned} \frac{dI1_{Na}}{dt} &= \alpha_{Na4}IF_{Na} - \beta_{Na4}I1_{Na} + \beta_{Na5}I2_{Na} - \alpha_{Na5}I1_{Na} \\ &\quad - \frac{k_{INa\_PKA}[C]^{cav}I1_{Na}}{K_{INa\_PKA} + I1_{Na}} + \frac{k_{INa\_PP}[PP]^{cav}I1_{Nap}}{K_{INa\_PP} + I1_{Nap}} \end{aligned} \quad (A.187)$$

$$\frac{dI2_{Na}}{dt} = \alpha_{Na5}I1_{Na} - \beta_{Na5}I2_{Na} - \frac{k_{INa\_PKA}[C]^{cav}I2_{Na}}{K_{INa\_PKA} + I2_{Na}} + \frac{k_{INa\_PP}[PP]^{cav}I2_{Nap}}{K_{INa\_PP} + I2_{Nap}} \quad (A.188)$$

$$\begin{aligned} \frac{dIC_{Na2}}{dt} &= \alpha_{Na11}IC_{Na3} - \beta_{Na11}IC_{Na2} + \beta_{Na12}IF_{Na} - \alpha_{Na12}IC_{Na2} + \beta_{Na3}C_{Na2} - \alpha_{Na3}IC_{Na2} \\ &\quad - \frac{k_{INa\_PKA}[C]^{cav}IC_{Na2}}{K_{INa\_PKA} + IC_{Na2}} + \frac{k_{INa\_PP}[PP]^{cav}IC_{Na2p}}{K_{INa\_PP} + IC_{Na2p}} \end{aligned} \quad (A.189)$$

$$\begin{aligned} \frac{dIC_{Na3}}{dt} &= \beta_{Na11}IC_{Na2} - \alpha_{Na11}IC_{Na3} + \beta_{Na3}C_{Na3} - \alpha_{Na3}IC_{Na3} \\ &\quad - \frac{k_{INa\_PKA}[C]^{cav}IC_{Na3}}{K_{INa\_PKA} + IC_{Na3}} + \frac{k_{INa\_PP}[PP]^{cav}IC_{Na3p}}{K_{INa\_PP} + IC_{Na3p}} \end{aligned} \quad (A.190)$$



$$\begin{aligned} \frac{dC_{Na3p}}{dt} &= \beta_{Na11}C_{Na2p} - \alpha_{Na11}C_{Na3p} + \alpha_{Na3}IC_{Na3p} - \beta_{Na3}C_{Na3p} \\ &+ \frac{k_{INa\_PKA}[C]^{cav}C_{Na3}}{K_{INa\_PKA} + C_{Na3}} - \frac{k_{INa\_PP}[PP]^{cav}C_{Na3p}}{K_{INa\_PP} + C_{Na3p}} \end{aligned} \quad (A.191)$$

$$\begin{aligned} \frac{dC_{Na2p}}{dt} &= \alpha_{Na11}C_{Na3p} - \beta_{Na11}C_{Na2p} + \beta_{Na12}C_{Na1p} - \alpha_{Na12}C_{Na2p} + \alpha_{Na3}IC_{Na2p} - \beta_{Na3}C_{Na2p} \\ &+ \frac{k_{INa\_PKA}[C]^{cav}C_{Na2}}{K_{INa\_PKA} + C_{Na2}} - \frac{k_{INa\_PP}[PP]^{cav}C_{Na2p}}{K_{INa\_PP} + C_{Na2p}} \end{aligned} \quad (A.192)$$

$$\begin{aligned} \frac{dC_{Na1p}}{dt} &= \alpha_{Na12}C_{Na2p} - \beta_{Na12}C_{Na1p} + \beta_{Na13}O_{Nap} - \alpha_{Na13}C_{Na1p} + \alpha_{Na3}IF_{Nap} - \beta_{Na3}C_{Na1p} \\ &+ \frac{k_{INa\_PKA}[C]^{cav}C_{Na1}}{K_{INa\_PKA} + C_{Na1}} - \frac{k_{INa\_PP}[PP]^{cav}C_{Na1p}}{K_{INa\_PP} + C_{Na1p}} \end{aligned} \quad (A.193)$$

$$\begin{aligned} \frac{dO_{Nap}}{dt} &= \alpha_{Na13}C_{Na1p} - \beta_{Na13}O_{Nap} + \beta_{Na2}IF_{Nap} - \alpha_{Na2}O_{Nap} \\ &+ \frac{k_{INa\_PKA}[C]^{cav}O_{Na}}{K_{INa\_PKA} + O_{Na}} - \frac{k_{INa\_PP}[PP]^{cav}O_{Nap}}{K_{INa\_PP} + O_{Nap}} \end{aligned} \quad (A.194)$$

$$\begin{aligned} \frac{dIF_{Nap}}{dt} &= \alpha_{Na2}O_{Nap} - \beta_{Na2}IF_{Nap} + \beta_{Na3}C_{Na1p} - \alpha_{Na3}IF_{Nap} + \beta_{Na4}I1_{Nap} - \alpha_{Na4}IF_{Nap} \\ &+ \alpha_{Na12}IC_{Na2p} - \beta_{Na12}IF_{Nap} + \frac{k_{INa\_PKA}[C]^{cav}IF_{Na}}{K_{INa\_PKA} + IF_{Na}} - \frac{k_{INa\_PP}[PP]^{cav}IF_{Nap}}{K_{INa\_PP} + IF_{Nap}} \end{aligned} \quad (A.195)$$

$$\begin{aligned} \frac{dI1_{Nap}}{dt} &= \alpha_{Na4}IF_{Nap} - \beta_{Na4}I1_{Nap} + \beta_{Na5}I2_{Nap} - \alpha_{Na5}I1_{Nap} \\ &+ \frac{k_{INa\_PKA}[C]^{cav}I1_{Na}}{K_{INa\_PKA} + I1_{Na}} - \frac{k_{INa\_PP}[PP]^{cav}I1_{Nap}}{K_{INa\_PP} + I1_{Nap}} \end{aligned} \quad (A.196)$$

$$\frac{dI2_{Nap}}{dt} = \alpha_{Na5}I1_{Nap} - \beta_{Na5}I2_{Nap} + \frac{k_{INa\_PKA}[C]^{cav}I2_{Na}}{K_{INa\_PKA} + I2_{Na}} - \frac{k_{INa\_PP}[PP]^{cav}I2_{Nap}}{K_{INa\_PP} + I2_{Nap}} \quad (A.197)$$

$$\begin{aligned} \frac{dIC_{Na2p}}{dt} = & \alpha_{Na11}IC_{Na3p} - \beta_{Na11}IC_{Na2p} + \beta_{Na12}IF_{Nap} - \alpha_{Na12}IC_{Na2p} + \beta_{Na3}C_{Na2p} - \alpha_{Na3}IC_{Na2p} \\ & + \frac{k_{INa\_PKA}[C]^{cav}IC_{Na2}}{K_{INa\_PKA} + IC_{Na2}} - \frac{k_{INa\_PP}[PP]^{cav}IC_{Na2p}}{K_{INa\_PP} + IC_{Na2p}} \end{aligned} \quad (A.198)$$

$$\begin{aligned} \frac{dIC_{Na3p}}{dt} = & \beta_{Na11}IC_{Na2p} - \alpha_{Na11}IC_{Na3p} + \beta_{Na3}C_{Na3p} - \alpha_{Na3}IC_{Na3p} \\ & + \frac{k_{INa\_PKA}[C]^{cav}IC_{Na3}}{K_{INa\_PKA} + IC_{Na3}} - \frac{k_{INa\_PP}[PP]^{cav}IC_{Na3p}}{K_{INa\_PP} + IC_{Na3p}} \end{aligned} \quad (A.199)$$

$$\alpha_{Na11} = \frac{3.802}{0.1027e^{-(V-2.5)/17.0} + 0.20e^{-(V-2.5)/150.0}} \quad (A.200)$$

$$\alpha_{Na12} = \frac{3.802}{0.1027e^{-(V-2.5)/15.0} + 0.23e^{-(V-2.5)/150.0}} \quad (A.201)$$

$$\alpha_{Na13} = \frac{3.802}{0.1027e^{-(V-2.5)/12.0} + 0.25e^{-(V-2.5)/150.0}} \quad (A.202)$$

$$\beta_{Na11} = 0.1917e^{-(V-2.5)/20.3} \quad (A.203)$$

$$\beta_{Na12} = 0.20e^{-(V-7.5)/20.3} \quad (A.204)$$

$$\beta_{Na13} = 0.22e^{-(V-12.5)/20.3} \quad (A.205)$$

$$\alpha_{Na3} = 7.0 \times 10^{-7} e^{-(V+7.0)/7.7} \quad (A.206)$$

$$\beta_{Na3} = 0.0084 + 0.00002(V + 7.0) \quad (A.207)$$

$$\alpha_{Na2} = \frac{1.0}{0.188495e^{-(V+7.0)/16.6} + 0.393956} \quad (A.208)$$

$$\beta_{Na2} = \alpha_{Na13}\alpha_{Na2}\alpha_{Na3}/(\beta_{Na13}\beta_{Na3}) \quad (A.209)$$

$$\alpha_{Na4} = \alpha_{Na2} / 100.0 \quad (\text{A.210})$$

$$\beta_{Na4} = \alpha_{Na3} \quad (\text{A.211})$$

$$\alpha_{Na5} = \alpha_{Na2} / 95000 \quad (\text{A.212})$$

$$\beta_{Na5} = \alpha_{Na3} / 50.0 \quad (\text{A.213})$$

### Ryanodine receptor module

| Parameter      | Definition                                                                   | Value                                                | Reference              |
|----------------|------------------------------------------------------------------------------|------------------------------------------------------|------------------------|
| $[RyR]_{tot}$  | Total cellular concentration of ryanodine receptors                          | 0.1993 $\mu\text{M}$                                 | Chu et al. [71]        |
| $v_1$          | Maximum RyR channel $\text{Ca}^{2+}$ permeability                            | 4,500 $\text{s}^{-1}$                                | Bondarenko et al. [25] |
| $n$            | RyR $\text{Ca}^{2+}$ cooperativity parameter $\text{P}_{C1} - \text{P}_{O1}$ | 4                                                    | Bondarenko et al. [25] |
| $m$            | RyR $\text{Ca}^{2+}$ cooperativity parameter $\text{P}_{O1} - \text{P}_{O2}$ | 3                                                    | Bondarenko et al. [25] |
| $k_a^+$        | RyR $\text{P}_{C1} - \text{P}_{O1}$ rate constant                            | 6.075 $\mu\text{M}^{-4} \text{s}^{-1}$               | Bondarenko et al. [25] |
| $k_a^-$        | RyR $\text{P}_{O1} - \text{P}_{C1}$ rate constant                            | 71.25 $\text{s}^{-1}$                                | Bondarenko et al. [25] |
| $k_b^+$        | RyR $\text{P}_{O1} - \text{P}_{O2}$ rate constant                            | 4.05 $\mu\text{M}^{-3} \text{s}^{-1}$                | Bondarenko et al. [25] |
| $k_b^-$        | RyR $\text{P}_{O2} - \text{P}_{O1}$ rate constant                            | 965.0 $\text{s}^{-1}$                                | Bondarenko et al. [25] |
| $k_c^+$        | RyR $\text{P}_{O1} - \text{P}_{C2}$ rate constant                            | 9.0 $\text{s}^{-1}$                                  | Bondarenko et al. [25] |
| $k_c^-$        | RyR $\text{P}_{C2} - \text{P}_{O1}$ rate constant                            | 0.8 $\text{s}^{-1}$                                  | Bondarenko et al. [25] |
| $k_{ap}^+$     | RyR $\text{P}_{C1p} - \text{P}_{O1p}$ rate constant                          | $5k_a^+$                                             | This paper             |
| $k_{ap}^-$     | RyR $\text{P}_{O1p} - \text{P}_{C1p}$ rate constant                          | $3k_a^-$                                             | This paper             |
| $k_{bp}^+$     | RyR $\text{P}_{O1p} - \text{P}_{O2p}$ rate constant                          | $5k_b^+$                                             | This paper             |
| $k_{bp}^-$     | RyR $\text{P}_{O2p} - \text{P}_{O1p}$ rate constant                          | $3k_b^-$                                             | This paper             |
| $k_{cp}^+$     | RyR $\text{P}_{O1p} - \text{P}_{C2p}$ rate constant                          | $50k_c^+$                                            | This paper             |
| $k_{cp}^-$     | RyR $\text{P}_{C2p} - \text{P}_{O1p}$ rate constant                          | $30k_c^-$                                            | This paper             |
| $f_{RyR}$      | Allosteric factor for RyR                                                    | 0.001                                                | This paper             |
| $k_{RyR\_PKA}$ | Phosphorylation rate of ryanodine receptors by PKA                           | $5.775 \cdot 10^{-2} \mu\text{M}^{-1} \text{s}^{-1}$ | This paper             |

|                |                                                      |                                          |            |
|----------------|------------------------------------------------------|------------------------------------------|------------|
| $k_{RyR\_PP}$  | Dephosphorylation rate of ryanodine receptors by PP1 | $0.28875 \mu\text{M}^{-1} \text{s}^{-1}$ | This paper |
| $K_{RyR\_PKA}$ | Affinity of ryanodine receptors for PKA              | $0.5 \mu\text{M}$                        | This paper |
| $K_{RyR\_PP}$  | Affinity of ryanodine receptors for PP1              | $0.05 \mu\text{M}$                       | This paper |

$$[RyR]^{ecav} = [RyR]_{tot} \frac{V_{cell}}{V_{ecav}} \quad (\text{A.214})$$

$$P_{C1} = 1 - (P_{C2} + P_{O1} + P_{O2} + P_{C1p} + P_{C2p} + P_{O1p} + P_{O2p}) \quad (\text{A.215})$$

$$\begin{aligned} \frac{dP_{O1}}{dt} = & k_a^+ [Ca^{2+}]_{ss}^n P_{C1} - k_a^- P_{O1} - k_b^+ [Ca^{2+}]_{ss}^m P_{O1} + k_b^- P_{O2} - k_c^+ P_{O1} + k_c^- P_{C2} \\ & - \frac{f_{RyR} k_{RyR\_PKA} [C]^{ecav} P_{O1}}{K_{RyR\_PKA} + [RyR]^{ecav} P_{O1}} + \frac{k_a^+ k_{ap}^- f_{RyR} k_{RyR\_PP} [PP1]^{ecav} P_{O1p}}{k_{ap}^+ k_a^- K_{RyR\_PP} + [RyR]^{ecav} P_{O1p}} \end{aligned} \quad (\text{A.216})$$

$$\begin{aligned} \frac{dP_{O2}}{dt} = & k_b^+ [Ca^{2+}]_{ss}^m P_{O1} - k_b^- P_{O2} \\ & - \frac{f_{RyR} k_{RyR\_PKA} [C]^{ecav} P_{O2}}{K_{RyR\_PKA} + [RyR]^{ecav} P_{O2}} + \frac{k_a^+ k_{ap}^- k_b^+ k_{bp}^- f_{RyR} k_{RyR\_PP} [PP1]^{ecav} P_{O2p}}{k_{ap}^+ k_a^- k_{bp}^+ k_b^- K_{RyR\_PP} + [RyR]^{ecav} P_{O2p}} \end{aligned} \quad (\text{A.217})$$

$$\begin{aligned} \frac{dP_{C2}}{dt} = & k_c^+ P_{O1} - k_c^- P_{C2} \\ & - \frac{f_{RyR} k_{RyR\_PKA} [C]^{ecav} P_{C2}}{K_{RyR\_PKA} + [RyR]^{ecav} P_{C2}} + \frac{k_a^+ k_{ap}^- k_c^+ k_{cp}^- f_{RyR} k_{RyR\_PP} [PP1]^{ecav} P_{C2p}}{k_{ap}^+ k_a^- k_{cp}^+ k_c^- K_{RyR\_PP} + [RyR]^{ecav} P_{C2p}} \end{aligned} \quad (\text{A.218})$$

$$\begin{aligned} \frac{dP_{C1p}}{dt} = & -k_{ap}^+ [Ca^{2+}]_{ss}^n P_{C1p} + k_{ap}^- P_{O1p} \\ & + \frac{k_{RyR\_PKA} [C]^{ecav} P_{C1}}{K_{RyR\_PKA} + [RyR]^{ecav} P_{C1}} - \frac{k_{RyR\_PP} [PP1]^{ecav} P_{C1p}}{K_{RyR\_PP} + [RyR]^{ecav} P_{C1p}} \end{aligned} \quad (\text{A.219})$$

$$\begin{aligned} \frac{dP_{O1p}}{dt} = & k_{ap}^+ [Ca^{2+}]_{ss}^n P_{C1p} - k_{ap}^- P_{O1p} - k_{bp}^+ [Ca^{2+}]_{ss}^m P_{O1p} + k_{bp}^- P_{O2p} - k_{cp}^+ P_{O1p} + k_{cp}^- P_{C2p} \\ & + \frac{f_{RyR} k_{RyR\_PKA} [C]^{ecav} P_{O1}}{K_{RyR\_PKA} + [RyR]^{ecav} P_{O1}} - \frac{k_a^+ k_{ap}^- f_{RyR} k_{RyR\_PP} [PP1]^{ecav} P_{O1p}}{k_{ap}^+ k_a^- K_{RyR\_PP} + [RyR]^{ecav} P_{O1p}} \end{aligned} \quad (\text{A.220})$$

$$\begin{aligned} \frac{dP_{O2p}}{dt} &= k_{bp}^+ [Ca^{2+}]_{ss}^m P_{O1p} - k_{bp}^- P_{O2p} \\ &+ \frac{f_{RyR} k_{RyR\_PKA} [C]^{ecav} P_{O2}}{K_{RyR\_PKA} + [RyR]^{ecav} P_{O2}} - \frac{k_a^+ k_{ap}^- k_b^+ k_{bp}^-}{k_{ap}^+ k_a^- k_{bp}^+ k_b^-} \frac{f_{RyR} k_{RyR\_PP} [PP1]^{ecav} P_{O2p}}{K_{RyR\_PP} + [RyR]^{ecav} P_{O2p}} \end{aligned} \quad (A.221)$$

$$\begin{aligned} \frac{dP_{C2p}}{dt} &= k_{cp}^+ P_{O1p} - k_{cp}^- P_{C2p} \\ &+ \frac{f_{RyR} k_{RyR\_PKA} [C]^{ecav} P_{C2}}{K_{RyR\_PKA} + [RyR]^{ecav} P_{C2}} - \frac{k_a^+ k_{ap}^- k_c^+ k_{cp}^-}{k_{ap}^+ k_a^- k_{cp}^+ k_c^-} \frac{f_{RyR} k_{RyR\_PP} [PP1]^{ecav} P_{C2p}}{K_{RyR\_PP} + [RyR]^{ecav} P_{C2p}} \end{aligned} \quad (A.222)$$

### Na<sup>+</sup>-K<sup>+</sup> pump module

| Parameter        | Definition                                                                                                         | Value                                    | Reference              |
|------------------|--------------------------------------------------------------------------------------------------------------------|------------------------------------------|------------------------|
| $I_{NaK}^{max}$  | Maximum Na <sup>+</sup> -K <sup>+</sup> pump current                                                               | 4.0 pA/pF                                | This paper             |
| $K_{m,Nai}^{np}$ | Na <sup>+</sup> half-saturation constant for Na <sup>+</sup> -K <sup>+</sup> pump current (non-phosphorylated PLM) | 18,800 μM                                | Despa et al. [100]     |
| $K_{m,Nai}^p$    | Na <sup>+</sup> half-saturation constant for Na <sup>+</sup> -K <sup>+</sup> pump current (phosphorylated PLM)     | 13,600 μM                                | Despa et al. [100]     |
| $K_{m,Ko}$       | K <sup>+</sup> half-saturation constant Na <sup>+</sup> -K <sup>+</sup> pump current                               | 1,500 μM                                 | Bondarenko et al. [25] |
| $k_{PLM\_PKA}$   | Rate of PLM phosphorylation by PKA                                                                                 | $3.053 \cdot 10^{-3} \mu M^{-1} s^{-1}$  | This paper             |
| $K_{PLM\_PKA}$   | Relative affinity for PLM phosphorylation by PKA                                                                   | 0.0011001                                | Heijman et al. [8]     |
| $k_{PLM\_PP}$    | Rate of PLM dephosphorylation by PP1 and PP2A                                                                      | $1.8491 \cdot 10^{-2} \mu M^{-1} s^{-1}$ | This paper             |
| $K_{PLM\_PP}$    | Relative affinity for PLM dephosphorylation by PP1 and PP2A                                                        | 5.7392                                   | Heijman et al. [8]     |

$$\frac{df_{PLM,p}^{cav}}{dt} = \frac{k_{PLM\_PKA} [C]^{cav} (1 - f_{PLM,p}^{cav})}{K_{PLM\_PKA} + (1 - f_{PLM,p}^{cav})} - \frac{k_{PLM\_PP} [PP]^{cav} f_{PLM,p}^{cav}}{K_{PLM\_PP} + f_{PLM,p}^{cav}} \quad (A.223)$$

$$I_{NaK} = I_{NaK}^{max} f_{NaK} \frac{1}{1 + (K_{m,Nai} / [Na^+]_i)^3} \frac{[K^+]_0}{[K^+]_0 + K_{m,Ko}} \quad (A.224)$$

$$f_{NaK} = \frac{1}{1 + 0.1245e^{-0.1VF/RT} + 0.0365\sigma e^{-VF/RT}} \quad (A.225)$$

$$\sigma = \frac{1}{7} (e^{[Na^+]_0 / 67300} - 1) \quad (\text{A.226})$$

$$K_{m,Nai} = K_{m,Nai}^{np} (1 - f_{PLM,p}^{cav}) + K_{m,Nai}^p f_{PLM,p}^{cav} \quad (\text{A.227})$$

### Ultra-rapidly activating delayed rectifier K<sup>+</sup> current module

| Parameter       | Definition                                                                                                                   | Value                                                 | Reference                  |
|-----------------|------------------------------------------------------------------------------------------------------------------------------|-------------------------------------------------------|----------------------------|
| $G_{Kur}$       | Specific maximum conductivity for the ultra-rapidly activating delayed rectifier K <sup>+</sup> current (non-phosphorylated) | 0.3424 pA/pF                                          | Petkova-Kirova et al. [26] |
| $G_{Kurp}$      | Specific maximum conductivity for the ultra-rapidly activating delayed rectifier K <sup>+</sup> current (phosphorylated)     | 0.53307 pA/pF                                         | This paper                 |
| $k_{IKur\_PKA}$ | Rate of I <sub>Kur</sub> phosphorylation by PKA                                                                              | $6.9537 \cdot 10^{-3} \mu\text{M}^{-1} \text{s}^{-1}$ | This paper                 |
| $K_{IKur\_PKA}$ | Relative affinity for I <sub>Kur</sub> phosphorylation by PKA                                                                | 0.138115                                              | This paper                 |
| $k_{IKur\_PP}$  | Rate of I <sub>Kur</sub> dephosphorylation by PP1                                                                            | $3.170 \cdot 10^{-2} \mu\text{M}^{-1} \text{s}^{-1}$  | This paper                 |
| $K_{IKur\_PP}$  | Relative affinity for I <sub>Kur</sub> dephosphorylation by PP1                                                              | 0.23310                                               | This paper                 |

$$E_K = \frac{RT}{F} \ln \left( \frac{[K^+]_o}{[K^+]_i} \right) \quad (\text{A.228})$$

$$I_{Kur} = (G_{Kur} a_{ur} i_{ur} f_{IKur}^{ecav} + G_{Kurp} a_{urp} i_{urp} (1 - f_{IKur}^{ecav})) (V - E_K) \quad (\text{A.229})$$

$$\frac{df_{IKur}^{ecav}}{dt} = \frac{k_{IKur\_PP} [PP1]^{ecav} (1 - f_{IKur}^{ecav})}{K_{IKur\_PP} + (1 - f_{IKur}^{ecav})} - \frac{k_{IKur\_PKA} [C]^{ecav} f_{IKur}^{ecav}}{K_{IKur\_PKA} + f_{IKur}^{ecav}} \quad (\text{A.230})$$

$$a_{ss} = \frac{1}{1 + e^{-(V+22.5)/7.7}} \quad (\text{A.231})$$

$$i_{ss} = \frac{1}{1 + e^{(V+45.2)/5.7}} \quad (\text{A.232})$$

$$\tau_{aur} = \frac{6.1}{e^{0.0629(V+40.0)} + e^{-0.0629(V+40.0)}} + 2.058 \quad (\text{A.233})$$

$$\tau_{iur} = 1200.0 - \frac{170.0}{1 + e^{(V+45.2)/5.7}} \quad (\text{A.234})$$

$$\frac{da_{ur}}{dt} = \frac{a_{ss} - a_{ur}}{\tau_{aur}} \quad (\text{A.235})$$

$$\frac{di_{ur}}{dt} = \frac{i_{ss} - i_{ur}}{\tau_{iur}} \quad (\text{A.236})$$

$$\frac{da_{urp}}{dt} = \frac{a_{ss} - a_{urp}}{\tau_{aur}} \quad (\text{A.237})$$

$$\frac{di_{urp}}{dt} = \frac{i_{ss} - i_{urp}}{\tau_{iur}} \quad (\text{A.238})$$

### Rapidly inactivating transient outward K<sup>+</sup> current module

| Parameter            | Definition                                                                                                               | Value                                                  | Reference                  |
|----------------------|--------------------------------------------------------------------------------------------------------------------------|--------------------------------------------------------|----------------------------|
| $G_{K_{to,f}}$       | Specific maximum conductivity for the rapidly inactivating transient outward K <sup>+</sup> current (non-phosphorylated) | 0.3846 pA/pF                                           | Petkova-Kirova et al. [26] |
| $G_{K_{to,fp}}$      | Specific maximum conductivity for the rapidly inactivating transient outward K <sup>+</sup> current (phosphorylated)     | $G_{K_{to,f}}$                                         | Petkova-Kirova et al. [26] |
| $k_{IK_{to,f\_PKA}}$ | Rate of I <sub>K<sub>to,f</sub></sub> phosphorylation by PKA                                                             | $4.38983 \cdot 10^{-2} \mu\text{M}^{-1} \text{s}^{-1}$ | This paper                 |
| $K_{IK_{to,f\_PKA}}$ | Relative affinity for I <sub>K<sub>to,f</sub></sub> phosphorylation by PKA                                               | 0.27623                                                | This paper                 |
| $k_{IK_{to,f\_PP}}$  | Rate of I <sub>K<sub>to,f</sub></sub> dephosphorylation by PP1                                                           | $9.09678 \cdot 10^{-2} \mu\text{M}^{-1} \text{s}^{-1}$ | This paper                 |
| $K_{IK_{to,f\_PP}}$  | Relative affinity for I <sub>K<sub>to,f</sub></sub> dephosphorylation by PP1                                             | 0.23310                                                | This paper                 |

$$I_{K_{to,f}} = (G_{K_{to,f}} a_{to,f}^3 i_{to,f} (1 - f_{IK_{to,f}}^{ecav}) + G_{K_{to,fp}} a_{to,fp}^3 i_{to,fp} f_{IK_{to,f}}^{ecav}) (V - E_K) \quad (\text{A.239})$$

$$\frac{df_{IK_{to,f}}^{ecav}}{dt} = \frac{k_{IK_{to,f\_PKA}} [C]^{ecav} (1 - f_{IK_{to,f}}^{ecav})}{K_{IK_{to,f\_PKA}} + (1 - f_{IK_{to,f}}^{ecav})} - \frac{k_{IK_{to,f\_PP}} [PP1]^{ecav} f_{IK_{to,f}}^{ecav}}{K_{IK_{to,f\_PP}} + f_{IK_{to,f}}^{ecav}} \quad (\text{A.240})$$

$$\frac{da_{i_{o,f}}}{dt} = \alpha_a(1 - a_{i_{o,f}}) - \beta_a a_{i_{o,f}} \quad (\text{A.241})$$

$$\frac{di_{i_{o,f}}}{dt} = \alpha_i(1 - i_{i_{o,f}}) - \beta_i i_{i_{o,f}} \quad (\text{A.242})$$

$$\frac{da_{i_{o,fp}}}{dt} = \alpha_{ap}(1 - a_{i_{o,fp}}) - \beta_{ap} a_{i_{o,fp}} \quad (\text{A.243})$$

$$\frac{di_{i_{o,fp}}}{dt} = \alpha_{ip}(1 - i_{i_{o,fp}}) - \beta_{ip} i_{i_{o,fp}} \quad (\text{A.244})$$

$$\alpha_a = 0.18064e^{0.03577(V+33.0)} \quad (\text{A.245})$$

$$\beta_a = 0.3956e^{-0.06237(V+33.0)} \quad (\text{A.246})$$

$$\alpha_i = \frac{0.000152e^{-(V+15.5)/7.0}}{0.067083e^{-(V+35.5)/7.0} + 1} \quad (\text{A.247})$$

$$\beta_i = \frac{0.00095e^{(V+35.5)/7.0}}{0.051335e^{(V+35.5)/7.0} + 1} \quad (\text{A.248})$$

$$\alpha_{ap} = 0.18064e^{0.03577(V+17.0)} \quad (\text{A.249})$$

$$\beta_{ap} = 0.3956e^{-0.06237(V+17.0)} \quad (\text{A.250})$$

$$\alpha_{ip} = \frac{0.000152e^{-(V+7.5)/7.0}}{0.067083e^{-(V+27.5)/7.0} + 1} \quad (\text{A.251})$$

$$\beta_{ip} = \frac{0.00095e^{(V+27.5)/7.0}}{0.051335e^{(V+27.5)/7.0} + 1} \quad (\text{A.252})$$

### Time-independent $K^+$ current module

$$\alpha_{K1} = \frac{1.02}{1 + \exp(0.2385(V - E_K - 59.215))} \quad (\text{A.253})$$



$$\beta_{K1} = \frac{0.8 \exp(0.08032(V - E_K + 5.476)) + \exp(0.06175(V - E_K - 594.31))}{1 + \exp(-0.5143(V - E_K + 4.753))} \quad (\text{A.254})$$

$$I_{K1} = 0.27 \sqrt{\frac{[K^+]_o}{5400}} \frac{\alpha_{K1}}{\alpha_{K1} + \beta_{K1}} (V - E_K) \quad (\text{A.255})$$

### Phospholamban module

| Parameter       | Definition                                                                         | Value                                                       | Reference          |
|-----------------|------------------------------------------------------------------------------------|-------------------------------------------------------------|--------------------|
| $K_{m,up}^{np}$ | Half-saturation constant for SR Ca <sup>2+</sup> -ATPase pump (non-phosphorylated) | 0.41 μM                                                     | This paper         |
| $K_{m,up}^p$    | Half-saturation constant for SR Ca <sup>2+</sup> -ATPase pump (phosphorylated)     | 0.31 μM                                                     | This paper         |
| $v_3$           | SR Ca <sup>2+</sup> -ATPase maximum pump rate                                      | 306.0 μM s <sup>-1</sup>                                    | This paper         |
| $k_{PLB\_PKA}$  | Rate of PLB phosphorylation by PKA                                                 | 0.108917 μM <sup>-1</sup> s <sup>-1</sup>                   | This paper         |
| $K_{PLB\_PKA}$  | Relative affinity for PLB phosphorylation by PKA                                   | 4.90970 · 10 <sup>-4</sup>                                  | Heijman et al. [8] |
| $k_{PLB\_PP1}$  | Rate of PLB dephosphorylation by PP1                                               | 4.41956 · 10 <sup>-2</sup> μM <sup>-1</sup> s <sup>-1</sup> | This paper         |
| $K_{PLB\_PP1}$  | Relative affinity for PLB dephosphorylation by PP1                                 | 1.69376 · 10 <sup>-2</sup>                                  | This paper         |

$$K_{m,up} = K_{m,up}^{np} (1 - f_{PLB,p}^{cyt}) + K_{m,up}^p f_{PLB,p}^{cyt} \quad (\text{A.256})$$

$$\frac{df_{PLB,p}^{cyt}}{dt} = \frac{k_{PLB\_PKA} \cdot [C]^{cyt} \cdot (1 - f_{PLB,p}^{cyt})}{K_{PLB\_PKA} + (1 - f_{PLB,p}^{cyt})} - \frac{k_{PLB\_PP1} \cdot [PP1]_f^{cyt} \cdot f_{PLB,p}^{cyt}}{K_{PLB\_PP1} + f_{PLB,p}^{cyt}} \quad (\text{A.257})$$

### Troponin I module

| Parameter       | Definition                                                         | Value                   | Reference              |
|-----------------|--------------------------------------------------------------------|-------------------------|------------------------|
| $[LTRPN]_{tot}$ | Total cytosolic troponin low-affinity site concentration           | 70.0 μM                 | Bondarenko et al. [25] |
| $[HTRPN]_{tot}$ | Total cytosolic troponin high-affinity site concentration          | 140.0 μM                | Bondarenko et al. [25] |
| $k_{htpni}^+$   | Ca <sup>2+</sup> on rate constant for troponin high-affinity sites | 2.37 μM s <sup>-1</sup> | Bondarenko et al. [25] |

|                 |                                                                                         |                                            |                        |
|-----------------|-----------------------------------------------------------------------------------------|--------------------------------------------|------------------------|
| $k_{hrpn}^-$    | Ca <sup>2+</sup> off rate constant for troponin high-affinity sites                     | 0.032 s <sup>-1</sup>                      | Bondarenko et al. [25] |
| $k_{lrpn}^+$    | Ca <sup>2+</sup> on rate constant for troponin low-affinity sites                       | 32.7 μM s <sup>-1</sup>                    | Bondarenko et al. [25] |
| $k_{lrpn,np}^-$ | Ca <sup>2+</sup> off rate constant for troponin low-affinity sites (non-phosphorylated) | 19.6 s <sup>-1</sup>                       | Bondarenko et al. [25] |
| $k_{lrpn,p}^-$  | Ca <sup>2+</sup> off rate constant for troponin low-affinity sites (phosphorylated)     | 29.4 s <sup>-1</sup>                       | This paper             |
| $k_{Tnl\_PKA}$  | Rate of TnI phosphorylation by PKA                                                      | 0.0247254 μM <sup>-1</sup> s <sup>-1</sup> | This paper             |
| $K_{Tnl\_PKA}$  | Relative affinity for TnI phosphorylation by PKA                                        | 2.71430 · 10 <sup>-5</sup>                 | Heijman et al. [8]     |
| $k_{Tnl\_PP2A}$ | Rate of TnI dephosphorylation by PP2A                                                   | 0.0865898 μM <sup>-1</sup> s <sup>-1</sup> | This paper             |
| $K_{Tnl\_PP2A}$ | Relative affinity for TnI dephosphorylation by PP2A                                     | 0.801420                                   | This paper             |

$$k_{lrpn}^- = k_{lrpn,np}^- (1 - f_{Tnl,p}^{cyt}) + k_{lrpn,p}^- f_{Tnl,p}^{cyt} \quad (\text{A.258})$$

$$\frac{df_{Tnl,p}^{cyt}}{dt} = \frac{k_{Tnl\_PKA} \cdot [C]^{cyt} \cdot (1 - f_{Tnl,p}^{cyt})}{K_{Tnl\_PKA} + (1 - f_{Tnl,p}^{cyt})} - \frac{k_{Tnl\_PP2A} \cdot [PP2A]^{cyt} \cdot f_{Tnl,p}^{cyt}}{K_{Tnl\_PP2A} + f_{Tnl,p}^{cyt}} \quad (\text{A.259})$$

$$\frac{d[LTRPNCa]}{dt} = k_{lrpn}^+ [Ca^{2+}]_i ([LTRPN]_{tot} - [LTRPNCa]) - k_{lrpn}^- [LTRPNCa] \quad (\text{A.260})$$

$$\frac{d[HTRPNCa]}{dt} = k_{hrpn}^+ [Ca^{2+}]_i ([HTRPN]_{tot} - [HTRPNCa]) - k_{hrpn}^- [HTRPNCa] \quad (\text{A.261})$$

## ELECTROPHYSIOLOGICAL PART. UNAFFECTED BY PKA

### Membrane potential

$$\frac{dV}{dt} = -\frac{1}{C_m} (I_{CaL} + I_{p(Ca)} + I_{NaCa} + I_{Cab} + I_{Na} + I_{Nab} + I_{NaK} + I_{Kto,f} + I_{K1} + I_{Kur} + I_{Kss} + I_{Kr} + I_{Cl,Ca} - I_{stim}) \quad (\text{A.262})$$

### Calcium dynamics: Calcium concentrations

$$\frac{d[Ca^{2+}]_i}{dt} = B_i \left\{ J_{leak} + J_{xfer} - J_{up} - J_{trpn} - (I_{Cab} - 2I_{NaCa} + I_{p(Ca)} + I_{CaL}^{cav}) \frac{A_{cap} C_m}{2V^{cvt} F} \right\} \quad (\text{A.263})$$

$$\frac{d[Ca^{2+}]_{ss}}{dt} = B_{ss} \left\{ J_{rel} \frac{V_{JSR}}{V_{ss}} - J_{xfer} \frac{V^{cvt}}{V_{ss}} - I_{CaL}^{cav} \frac{A_{cap} C_m}{2V_{ss} F} \right\} \quad (\text{A.264})$$

$$\frac{d[Ca^{2+}]_{JSR}}{dt} = B_{JSR} \{ J_{tr} - J_{rel} \} \quad (\text{A.265})$$

$$\frac{d[Ca^{2+}]_{NSR}}{dt} = \{ J_{up} - J_{leak} \} \frac{V^{cvt}}{V_{NSR}} - J_{tr} \frac{V_{JSR}}{V_{NSR}} \quad (\text{A.266})$$

$$B_i = \left\{ 1 + \frac{[CMDN]_{tot} K_m^{CMDN}}{(K_m^{CMDN} + [Ca^{2+}]_i)^2} \right\}^{-1} \quad (\text{A.267})$$

$$B_{ss} = \left\{ 1 + \frac{[CMDN]_{tot} K_m^{CMDN}}{(K_m^{CMDN} + [Ca^{2+}]_{ss})^2} \right\}^{-1} \quad (\text{A.268})$$

$$B_{JSR} = \left\{ 1 + \frac{[CSQN]_{tot} K_m^{CSQN}}{(K_m^{CSQN} + [Ca^{2+}]_{JSR})^2} \right\}^{-1} \quad (\text{A.269})$$

### Calcium dynamics: Calcium fluxes

$$J_{rel} = v_1 (P_{O1} + P_{O2} + P_{O1p} + P_{O2p}) ([Ca^{2+}]_{JSR} - [Ca^{2+}]_{ss} P_{RyR}) \quad (\text{A.270})$$

$$J_{tr} = \frac{[Ca^{2+}]_{NSR} - [Ca^{2+}]_{JSR}}{\tau_{tr}} \quad (\text{A.271})$$

$$J_{xfer} = \frac{[Ca^{2+}]_{ss} - [Ca^{2+}]_i}{\tau_{xfer}} \quad (A.272)$$

$$J_{leak} = v_2 ([Ca^{2+}]_{NSR} - [Ca^{2+}]_i) \quad (A.273)$$

$$J_{up} = v_3 \frac{[Ca^{2+}]_i^2}{K_{m,up}^2 + [Ca^{2+}]_i^2} \quad (A.274)$$

$$J_{irpn} = k_{irpn}^+ [Ca^{2+}]_i ([HTRPN]_{tot} - [HTRPNCa]) - k_{irpn}^- [HTRPNCa] \\ + k_{lirpn}^+ [Ca^{2+}]_i ([LTRPN]_{tot} - [LTRPNCa]) - k_{lirpn}^- [LTRPNCa] \quad (A.275)$$

$$\frac{dP_{RyR}}{dt} = -0.04P_{RyR} - 0.1 \frac{I_{CaL}^{ecav}}{I_{CaL,max}} e^{-\frac{(V+5.0)^2}{648.0}} \quad (A.276)$$

### Calcium pump current

$$I_{p(Ca)} = I_{p(Ca)}^{max} \frac{[Ca^{2+}]_i^2}{K_{m,p(Ca)}^2 + [Ca^{2+}]_i^2} \quad (A.277)$$

### Na<sup>+</sup>/Ca<sup>2+</sup> exchanger current

$$I_{NaCa} = k_{NaCa} \frac{1}{K_{m,Na}^3 + [Na^+]_o^3} \frac{1}{K_{m,Ca} + [Ca^{2+}]_o} \frac{1}{1 + k_{sat} e^{(\eta-1)VF/RT}} \\ \times (e^{\eta VF/RT} [Na^+]_i^3 [Ca^{2+}]_o - 2.0 e^{(\eta-1)VF/RT} [Na^+]_o^3 [Ca^{2+}]_i) \quad (A.278)$$

### Calcium background current

$$I_{Cab} = G_{Cab} (V - E_{CaN}) \quad (A.279)$$

$$E_{CaN} = \frac{RT}{2F} \ln \left( \frac{[Ca^{2+}]_o}{[Ca^{2+}]_i} \right) \quad (A.280)$$

**Sodium dynamics: Sodium concentration**

$$\frac{d[Na^+]_i}{dt} = -(I_{Na_f} + I_{Na_b} + 3I_{NaCa} + 3I_{NaK}) \frac{A_{cap} C_m}{V^{cyt} F} \quad (A.281)$$

**Sodium background current**

$$I_{Na_b} = G_{Na_b} (V - E_{Na}) \quad (A.282)$$

**Potassium dynamics: Potassium concentration**

$$\frac{d[K^+]_i}{dt} = -(I_{Kto,f} + I_{Kto,s} + I_{Kur} + I_{Kss} + I_{K1} + I_{Kr} + I_{Ks} - 2I_{NaK}) \frac{A_{cap} C_m}{V^{cyt} F} \quad (A.283)$$

**Non-inactivating steady-state K<sup>+</sup> current**

$$I_{Kss} = G_{Kss} a_{Kss} (V - E_K) \quad (A.284)$$

$$\frac{da_{Kss}}{dt} = \frac{a_{ss} - a_{Kss}}{\tau_{Kss}} \quad (A.285)$$

$$\tau_{Kss} = \frac{1235.5}{e^{0.0862(V+40.0)} + e^{-0.0862(V+40.0)}} + 13.17 \quad (A.286)$$

**Rapid delayed rectifier K<sup>+</sup> current**

$$I_{Kr} = G_{Kr} O_{Kr} (V - E_{Kr}) \quad (A.287)$$

$$E_{Kr} = \frac{RT}{F} \ln \left( \frac{0.98[K^+]_o + 0.02[Na^+]_o}{0.98[K^+]_i + 0.02[Na^+]_i} \right) \quad (A.288)$$

$$C_{Kr0} = 1 - (C_{Kr1} + C_{Kr2} + O_{Kr} + I_{Kr1}) \quad (\text{A.289})$$

$$\frac{dC_{Kr1}}{dt} = \alpha_{a0}C_{Kr0} - \beta_{a0}C_{Kr1} + k_bC_{Kr2} - k_fC_{Kr1} \quad (\text{A.290})$$

$$\frac{dC_{Kr2}}{dt} = k_fC_{Kr1} - k_bC_{Kr2} + \beta_{a1}O_{Kr} - \alpha_{a1}C_{Kr2} \quad (\text{A.291})$$

$$\frac{dO_{Kr}}{dt} = \alpha_{a1}C_{Kr2} - \beta_{a1}O_{Kr} + \beta_{ir}I_{Kr1} - \alpha_{ir}O_{Kr} \quad (\text{A.292})$$

$$\frac{dI_{Kr1}}{dt} = \alpha_{ir}O_{Kr} + \beta_{ir}I_{Kr1} \quad (\text{A.293})$$

$$\alpha_{a0} = 0.022348e^{0.01176V} \quad (\text{A.294})$$

$$\beta_{a0} = 0.047002e^{-0.0631V} \quad (\text{A.295})$$

$$\alpha_{a1} = 0.013733e^{0.038198V} \quad (\text{A.296})$$

$$\beta_{a1} = 0.0000689e^{-0.04178V} \quad (\text{A.297})$$

$$\alpha_{ir} = 0.090821e^{0.023391(V+5.0)} \quad (\text{A.298})$$

$$\beta_{ir} = 0.006497e^{-0.03268(V+5.0)} \quad (\text{A.299})$$

### Ca<sup>2+</sup>-activated Cl<sup>-</sup> current

$$I_{Cl,Ca} = G_{Cl,Ca} O_{Cl,Ca} \frac{[Ca^{2+}]_i}{[Ca^{2+}]_i + K_{m,Cl}} (V - E_{Cl}) \quad (\text{A.300})$$

$$O_{Cl,Ca} = \frac{0.2}{1 + e^{-(V-46.7)/7.8}} \quad (\text{A.301})$$

### Extracellular ion concentrations

| Parameter     | Definition                            | Value                 | Reference              |
|---------------|---------------------------------------|-----------------------|------------------------|
| $[K^+]_o$     | Extracellular $K^+$ concentration     | 5,400 $\mu\text{M}$   | Bondarenko et al. [25] |
| $[Na^+]_o$    | Extracellular $Na^+$ concentration    | 140,000 $\mu\text{M}$ | Bondarenko et al. [25] |
| $[Ca^{2+}]_o$ | Extracellular $Ca^{2+}$ concentration | 1,800 $\mu\text{M}$   | Bondarenko et al. [25] |

### Sarcoplasmic reticulum parameters

| Parameter     | Definition                                          | Value                               | Reference              |
|---------------|-----------------------------------------------------|-------------------------------------|------------------------|
| $v_2$         | $Ca^{2+}$ leak rate constant from the NSR           | $1.74 \cdot 10^{-2} \text{ s}^{-1}$ | Bondarenko et al. [25] |
| $\tau_{tr}$   | Time constant for transfer from NSR to JSR          | 0.02 s                              | Bondarenko et al. [25] |
| $\tau_{xfer}$ | Time constant for transfer from subspace to cytosol | 0.008 s                             | Bondarenko et al. [25] |

### Calmodulin and calsequestrin parameters

| Parameter      | Definition                                           | Value                  | Reference              |
|----------------|------------------------------------------------------|------------------------|------------------------|
| $[CMDN]_{tot}$ | Total cytosolic calmodulin concentration             | 50.0 $\mu\text{M}$     | Bondarenko et al. [25] |
| $[CSQN]_{tot}$ | Total JSR calsequestrin concentration                | 15,000.0 $\mu\text{M}$ | Bondarenko et al. [25] |
| $K_m^{CMDN}$   | $Ca^{2+}$ half-saturation constant for calmodulin    | 0.238 $\mu\text{M}$    | Bondarenko et al. [25] |
| $K_m^{CSQN}$   | $Ca^{2+}$ half-saturation constant for calsequestrin | 800.0 $\mu\text{M}$    | Bondarenko et al. [25] |

### Membrane current parameters

| Parameter | Definition                    | Value                                    | Reference              |
|-----------|-------------------------------|------------------------------------------|------------------------|
| $C_m$     | Specific membrane capacitance | 1.0 $\mu\text{F}/\text{cm}^2$            | Bondarenko et al. [25] |
| $F$       | Faraday constant              | 96.5 C/mmol                              | Bondarenko et al. [25] |
| $T$       | Absolute temperature          | 298 K                                    | Bondarenko et al. [25] |
| $R$       | Ideal gas constant            | 8.314 $\text{J mol}^{-1} \text{ K}^{-1}$ | Bondarenko et al. [25] |

|                   |                                                                                                    |                        |                            |
|-------------------|----------------------------------------------------------------------------------------------------|------------------------|----------------------------|
| $k_{NaCa}$        | Scaling factor for Na <sup>+</sup> /Ca <sup>2+</sup> exchanger                                     | 275 pA/pF              | This paper                 |
| $K_{m,Na}$        | Na <sup>+</sup> half-saturation constant for Na <sup>+</sup> /Ca <sup>2+</sup> exchanger           | 87,500 μM              | Bondarenko et al. [25]     |
| $K_{m,Ca}$        | Ca <sup>2+</sup> half-saturation constant for Na <sup>+</sup> /Ca <sup>2+</sup> exchanger          | 1,380 μM               | Bondarenko et al. [25]     |
| $k_{sat}$         | Na <sup>+</sup> /Ca <sup>2+</sup> exchanger saturation factor at very negative potentials          | 0.27                   | This paper                 |
| $\eta$            | Controls voltage dependence of Na <sup>+</sup> /Ca <sup>2+</sup> exchanger                         | 0.35                   | Bondarenko et al. [25]     |
| $I_{p(Ca)}^{max}$ | Maximum sarcolemmal Ca <sup>2+</sup> pump current                                                  | 0.051                  | This paper                 |
| $K_{m,p(Ca)}$     | Ca <sup>2+</sup> half-saturation constant for sarcolemmal Ca <sup>2+</sup> pump current            | 0.5 μM                 | Bondarenko et al. [25]     |
| $G_{Cab}$         | Maximum background Ca <sup>2+</sup> current conductance                                            | 0.000284 mS/μF         | This paper                 |
| $G_{Nab}$         | Maximum background Na <sup>+</sup> current conductance                                             | 0.0063 mS/μF           | This paper                 |
| $G_{Kto,s}$       | Specific maximum conductivity for the slowly inactivating transient outward K <sup>+</sup> current | 0.0 mS/μF              | Bondarenko et al. [25]     |
| $G_{Kss}$         | Specific maximum conductivity for the noninactivating steady-state K <sup>+</sup> current          | 0.0611 mS/μF           | Petkova-Kirova et al. [26] |
| $G_{Ks}$          | Specific maximum conductivity for the slow delayed rectifier K <sup>+</sup> current                | 0.00575 mS/μF          | Bondarenko et al. [25]     |
| $G_{Kr}$          | Specific maximum conductivity for the rapid delayed rectifier K <sup>+</sup> current               | 0.078 mS/μF            | Bondarenko et al. [25]     |
| $k_f$             | Rate constant for the rapid delayed rectifier K <sup>+</sup> current                               | 23.761 s <sup>-1</sup> | Bondarenko et al. [25]     |
| $k_b$             | Rate constant for the rapid delayed rectifier K <sup>+</sup> current                               | 36.778 s <sup>-1</sup> | Bondarenko et al. [25]     |
| $G_{Cl,Ca}$       | Specific maximum conductivity for the Ca <sup>2+</sup> -activated Cl <sup>-</sup> current          | 10.0 mS/μF             | Bondarenko et al. [25]     |
| $K_{m,Cl}$        | Half-saturation constant for the Ca <sup>2+</sup> -activated Cl <sup>-</sup> current               | 10.0 μM                | Bondarenko et al. [25]     |
| $E_{Cl}$          | Reversal potential for the Ca <sup>2+</sup> -activated Cl <sup>-</sup> current                     | -40 mV                 | Bondarenko et al. [25]     |



## INITIAL CONDITIONS

| Variable          | Definition                                                                    | Initial Value             |
|-------------------|-------------------------------------------------------------------------------|---------------------------|
| V                 | Membrane potential                                                            | -78.2787 mV               |
| $[Ca^{2+}]_i$     | Myoplasmic $Ca^{2+}$ concentration                                            | 0.100157 $\mu$ M          |
| $[Ca^{2+}]_{ss}$  | Subspace SR $Ca^{2+}$ concentration                                           | 0.100157 $\mu$ M          |
| $[Ca^{2+}]_{JSR}$ | Junctional SR $Ca^{2+}$ concentration                                         | 1081.23 $\mu$ M           |
| $[Ca^{2+}]_{NSR}$ | Network SR $Ca^{2+}$ concentration                                            | 1081.23 $\mu$ M           |
| [LTRPNCa]         | Concentration $Ca^{2+}$ bound by low-affinity troponin binding sites          | 8.66981 $\mu$ M           |
| [HTRPNCa]         | Concentration $Ca^{2+}$ bound by high-affinity troponin binding sites         | 123.369 $\mu$ M           |
| $O^{cav}$         | L-type $Ca^{2+}$ channel conducting state (non-phosphorylated, caveolae)      | $0.320206 \cdot 10^{-11}$ |
| $C_1^{cav}$       | L-type $Ca^{2+}$ channel closed state (non-phosphorylated, caveolae)          | 0.973685                  |
| $C_2^{cav}$       | L-type $Ca^{2+}$ channel closed state (non-phosphorylated, caveolae)          | $0.524483 \cdot 10^{-2}$  |
| $C_3^{cav}$       | L-type $Ca^{2+}$ channel closed state (non-phosphorylated, caveolae)          | $0.105944 \cdot 10^{-4}$  |
| $C_4^{cav}$       | L-type $Ca^{2+}$ channel closed state (non-phosphorylated, caveolae)          | $0.951124 \cdot 10^{-8}$  |
| $C_p^{cav}$       | L-type $Ca^{2+}$ channel closed state (non-phosphorylated, caveolae)          | $0.320207 \cdot 10^{-11}$ |
| $I_1^{cav}$       | L-type $Ca^{2+}$ channel inactivated state (non-phosphorylated, caveolae)     | $0.308577 \cdot 10^{-11}$ |
| $I_2^{cav}$       | L-type $Ca^{2+}$ channel inactivated state (non-phosphorylated, caveolae)     | $0.217536 \cdot 10^{-7}$  |
| $I_3^{cav}$       | L-type $Ca^{2+}$ channel inactivated state (non-phosphorylated, caveolae)     | $0.209641 \cdot 10^{-7}$  |
| $O_p^{cav}$       | L-type $Ca^{2+}$ channel conducting state (phosphorylated, caveolae)          | $0.562222 \cdot 10^{-10}$ |
| $C_{1p}^{cav}$    | L-type $Ca^{2+}$ channel closed state (phosphorylated, caveolae)              | $0.206347 \cdot 10^{-1}$  |
| $C_{2p}^{cav}$    | L-type $Ca^{2+}$ channel closed state (phosphorylated, caveolae)              | $0.421668 \cdot 10^{-3}$  |
| $C_{3p}^{cav}$    | L-type $Ca^{2+}$ channel closed state (phosphorylated, caveolae)              | $0.323128 \cdot 10^{-5}$  |
| $C_{4p}^{cav}$    | L-type $Ca^{2+}$ channel closed state (phosphorylated, caveolae)              | $0.110051 \cdot 10^{-7}$  |
| $C_{pp}^{cav}$    | L-type $Ca^{2+}$ channel closed state (phosphorylated, caveolae)              | $0.140555 \cdot 10^{-10}$ |
| $I_{1p}^{cav}$    | L-type $Ca^{2+}$ channel inactivated state (phosphorylated, caveolae)         | $0.541817 \cdot 10^{-10}$ |
| $I_{2p}^{cav}$    | L-type $Ca^{2+}$ channel inactivated state (phosphorylated, caveolae)         | $0.100683 \cdot 10^{-6}$  |
| $I_{3p}^{cav}$    | L-type $Ca^{2+}$ channel inactivated state (phosphorylated, caveolae)         | $0.970287 \cdot 10^{-7}$  |
| $O^{ecav}$        | L-type $Ca^{2+}$ channel conducting state (non-phosphorylated, extracaveolae) | $0.286851 \cdot 10^{-11}$ |
| $C_1^{ecav}$      | L-type $Ca^{2+}$ channel closed state (non-phosphorylated, extracaveolae)     | 0.872261                  |
| $C_2^{ecav}$      | L-type $Ca^{2+}$ channel closed state (non-phosphorylated, extracaveolae)     | $0.469850 \cdot 10^{-2}$  |
| $C_3^{ecav}$      | L-type $Ca^{2+}$ channel closed state (non-phosphorylated, extracaveolae)     | $0.949082 \cdot 10^{-5}$  |

|                 |                                                                                |                           |
|-----------------|--------------------------------------------------------------------------------|---------------------------|
| $C_4^{ecav}$    | L-type $Ca^{2+}$ channel closed state (non-phosphorylated, extracaveolae)      | $0.852050 \cdot 10^{-8}$  |
| $C_p^{ecav}$    | L-type $Ca^{2+}$ channel closed state (non-phosphorylated, extracaveolae)      | $0.286852 \cdot 10^{-11}$ |
| $I_1^{ecav}$    | L-type $Ca^{2+}$ channel inactivated state (non-phosphorylated, extracaveolae) | $0.276420 \cdot 10^{-11}$ |
| $I_2^{ecav}$    | L-type $Ca^{2+}$ channel inactivated state (non-phosphorylated, extracaveolae) | $0.194870 \cdot 10^{-7}$  |
| $I_3^{ecav}$    | L-type $Ca^{2+}$ channel inactivated state (non-phosphorylated, extracaveolae) | $0.187798 \cdot 10^{-7}$  |
| $O_p^{ecav}$    | L-type $Ca^{2+}$ channel conducting state (phosphorylated, extracaveolae)      | $0.328449 \cdot 10^{-9}$  |
| $C_{1p}^{ecav}$ | L-type $Ca^{2+}$ channel closed state (phosphorylated, extracaveolae)          | 0.120548                  |
| $C_{2p}^{ecav}$ | L-type $Ca^{2+}$ channel closed state (phosphorylated, extracaveolae)          | $0.246338 \cdot 10^{-2}$  |
| $C_{3p}^{ecav}$ | L-type $Ca^{2+}$ channel closed state (phosphorylated, extracaveolae)          | $0.188771 \cdot 10^{-4}$  |
| $C_{4p}^{ecav}$ | L-type $Ca^{2+}$ channel closed state (phosphorylated, extracaveolae)          | $0.642918 \cdot 10^{-7}$  |
| $C_{pp}^{ecav}$ | L-type $Ca^{2+}$ channel closed state (phosphorylated, extracaveolae)          | $0.821123 \cdot 10^{-10}$ |
| $I_{1p}^{ecav}$ | L-type $Ca^{2+}$ channel inactivated state (phosphorylated, extracaveolae)     | $0.316528 \cdot 10^{-9}$  |
| $I_{2p}^{ecav}$ | L-type $Ca^{2+}$ channel inactivated state (phosphorylated, extracaveolae)     | $0.588189 \cdot 10^{-6}$  |
| $I_{3p}^{ecav}$ | L-type $Ca^{2+}$ channel inactivated state (phosphorylated, extracaveolae)     | $0.566840 \cdot 10^{-6}$  |
| $C_{Na3}$       | Fast $Na^+$ channel closed state (non-phosphorylated)                          | 0.436222                  |
| $C_{Na2}$       | Fast $Na^+$ channel closed state (non-phosphorylated)                          | $0.132248 \cdot 10^{-1}$  |
| $C_{Na1}$       | Fast $Na^+$ channel closed state (non-phosphorylated)                          | $0.161178 \cdot 10^{-3}$  |
| $O_{Na}$        | Fast $Na^+$ channel open state (non-phosphorylated)                            | $0.367777 \cdot 10^{-6}$  |
| $IF_{Na}$       | Fast $Na^+$ channel inactivated state (non-phosphorylated)                     | $0.153271 \cdot 10^{-3}$  |
| $I1_{Na}$       | Fast $Na^+$ channel inactivated state (non-phosphorylated)                     | $0.146044 \cdot 10^{-4}$  |
| $I2_{Na}$       | Fast $Na^+$ channel inactivated state (non-phosphorylated)                     | $0.545874 \cdot 10^{-7}$  |
| $IC_{Na2}$      | Fast $Na^+$ channel inactivated state (non-phosphorylated)                     | $0.125760 \cdot 10^{-1}$  |
| $IC_{Na3}$      | Fast $Na^+$ channel inactivated state (non-phosphorylated)                     | 0.414822                  |
| $C_{Na3p}$      | Fast $Na^+$ channel closed state (phosphorylated)                              | $0.610809 \cdot 10^{-1}$  |
| $C_{Na2p}$      | Fast $Na^+$ channel closed state (phosphorylated)                              | $0.185179 \cdot 10^{-2}$  |
| $C_{Na1p}$      | Fast $Na^+$ channel closed state (phosphorylated)                              | $0.225696 \cdot 10^{-4}$  |
| $O_{Nap}$       | Fast $Na^+$ channel open state (phosphorylated)                                | $0.515006 \cdot 10^{-7}$  |
| $IF_{Nap}$      | Fast $Na^+$ channel inactivated state (phosphorylated)                         | $0.214630 \cdot 10^{-4}$  |
| $I1_{Nap}$      | Fast $Na^+$ channel inactivated state (phosphorylated)                         | $0.217162 \cdot 10^{-5}$  |
| $I2_{Nap}$      | Fast $Na^+$ channel inactivated state (phosphorylated)                         | $0.301835 \cdot 10^{-7}$  |

|                                 |                                                                             |                             |
|---------------------------------|-----------------------------------------------------------------------------|-----------------------------|
| $IC_{Na2p}$                     | Fast Na <sup>+</sup> channel inactivated state (phosphorylated)             | $0.176099 \cdot 10^{-2}$    |
| $IC_{Na3p}$                     | Fast Na <sup>+</sup> channel inactivated state (phosphorylated)             | $0.580859 \cdot 10^{-1}$    |
| $P_{C1}$                        | RyR channel closed state (non-phosphorylated)                               | 0.996216                    |
| $P_{C2}$                        | RyR channel closed state (non-phosphorylated)                               | $0.961561 \cdot 10^{-4}$    |
| $P_{O1}$                        | RyR channel open state (non-phosphorylated)                                 | $0.854737 \cdot 10^{-5}$    |
| $P_{O2}$                        | RyR channel open state (non-phosphorylated)                                 | $0.360412 \cdot 10^{-10}$   |
| $P_{C1p}$                       | RyR channel closed state (phosphorylated)                                   | $0.367832 \cdot 10^{-2}$    |
| $P_{C2p}$                       | RyR channel closed state (phosphorylated)                                   | $0.986431 \cdot 10^{-6}$    |
| $P_{O1p}$                       | RyR channel open state (phosphorylated)                                     | $0.526065 \cdot 10^{-7}$    |
| $P_{O2p}$                       | RyR channel open state (phosphorylated)                                     | $0.369705 \cdot 10^{-12}$   |
| $[Na^+]_i$                      | Myoplasmic Na <sup>+</sup> concentration                                    | 10,508.5 μM                 |
| $[K^+]_i$                       | Myoplasmic K <sup>+</sup> concentration                                     | 145,400 μM                  |
| $f_{PLM,p}^{cav}$               | Fraction of phosphorylated phospholemman                                    | 0.225905                    |
| $f_{IKur}^{ecav}$               | Fraction of non-phosphorylated I <sub>Kur</sub>                             | 0.908852                    |
| $a_{ur}$                        | Activation gate of non-phosphorylated I <sub>Kur</sub>                      | $0.713943 \cdot 10^{-3}$    |
| $i_{ur}$                        | Inactivation gate of non-phosphorylated I <sub>Kur</sub>                    | 0.996991                    |
| $a_{urp}$                       | Activation gate of phosphorylated I <sub>Kur</sub>                          | $0.713943 \cdot 10^{-3}$    |
| $i_{urp}$                       | Inactivation gate of phosphorylated I <sub>Kur</sub>                        | 0.996991                    |
| $f_{IKto,f}^{ecav}$             | Fraction of phosphorylated I <sub>Kto,f</sub>                               | 0.252661                    |
| $a_{to,f}$                      | Activation gate of non-phosphorylated I <sub>Kto,f</sub>                    | $0.533799 \cdot 10^{-2}$    |
| $i_{to,f}$                      | Inactivation gate of non-phosphorylated I <sub>Kto,f</sub>                  | 0.999945                    |
| $a_{to,fp}$                     | Activation gate of phosphorylated I <sub>Kto,f</sub>                        | $0.111499 \cdot 10^{-2}$    |
| $i_{to,fp}$                     | Inactivation gate of phosphorylated I <sub>Kto,f</sub>                      | 0.999983                    |
| $f_{PLB,p}^{cvt}$               | Fraction of phosphorylated phospholamban                                    | 0.186637                    |
| $f_{Tnl,p}^{cvt}$               | Fraction of phosphorylated troponin I                                       | 0.364102                    |
| $P_{RyR}$                       | RyR modulation factor                                                       | $0.254152 \cdot 10^{-11}$   |
| $a_{Kss}$                       | Activation gate of I <sub>Kss</sub>                                         | $0.713943 \cdot 10^{-3}$    |
| $C_{K0}$                        | mERG channel closed state                                                   | 0.997365                    |
| $C_{K1}$                        | mERG channel closed state                                                   | $0.135218 \cdot 10^{-2}$    |
| $C_{K2}$                        | mERG channel closed state                                                   | $0.873596 \cdot 10^{-3}$    |
| $O_K$                           | mERG channel open state                                                     | $0.332600 \cdot 10^{-3}$    |
| $I_K$                           | mERG channel inactivated state                                              | $0.763767 \cdot 10^{-4}$    |
| $[R_{\beta 1}]_{PKA,tot}^{cav}$ | Concentration of total β <sub>1</sub> -ARs phosphorylated by PKA (caveolae) | $0.799452 \cdot 10^{-3}$ μM |

|                                   |                                                                              |                                       |
|-----------------------------------|------------------------------------------------------------------------------|---------------------------------------|
| $[R_{\beta 1}]_{GRK2,tot}^{cav}$  | Concentration of total $\beta_1$ -ARs phosphorylated by GRK2 (caveolae)      | $0.626341 \cdot 10^{-27} \mu\text{M}$ |
| $[G_s]_{\alpha,GTP}^{cav}$        | Concentration of active $G_{s\alpha}$ subunit (caveolae)                     | $0.132189 \cdot 10^{-2} \mu\text{M}$  |
| $[G_s]_{\beta\gamma}^{cav}$       | Concentration of $G_{s\beta\gamma}$ subunit (caveolae)                       | $0.180824 \cdot 10^{-2} \mu\text{M}$  |
| $[G_s]_{\alpha,GDP}^{cav}$        | Concentration of inactive $G_{s\alpha}$ subunit (caveolae)                   | $0.487356 \cdot 10^{-3} \mu\text{M}$  |
| $[R_{\beta 1}]_{PKA,tot}^{ecav}$  | Concentration of total $\beta_1$ -ARs phosphorylated by PKA (extracaveolae)  | $0.478002 \cdot 10^{-1} \mu\text{M}$  |
| $[R_{\beta 1}]_{GRK2,tot}^{ecav}$ | Concentration of total $\beta_1$ -ARs phosphorylated by GRK2 (extracaveolae) | $0.626341 \cdot 10^{-27} \mu\text{M}$ |
| $[G_s]_{\alpha,GTP}^{ecav}$       | Concentration of active $G_{s\alpha}$ subunit (extracaveolae)                | $0.230801 \cdot 10^{-1} \mu\text{M}$  |
| $[G_s]_{\beta\gamma}^{ecav}$      | Concentration of $G_{s\beta\gamma}$ subunit (extracaveolae)                  | $0.237276 \cdot 10^{-1} \mu\text{M}$  |
| $[G_s]_{\alpha,GDP}^{ecav}$       | Concentration of inactive $G_{s\alpha}$ subunit (extracaveolae)              | $0.648475 \cdot 10^{-3} \mu\text{M}$  |
| $[R_{\beta 1}]_{PKA,tot}^{cyt}$   | Concentration of total $\beta_1$ -ARs phosphorylated by PKA (cytosol)        | $0.155949 \cdot 10^{-2} \mu\text{M}$  |
| $[R_{\beta 1}]_{GRK2,tot}^{cyt}$  | Concentration of total $\beta_1$ -ARs phosphorylated by GRK2 (cytosol)       | $0.626341 \cdot 10^{-27} \mu\text{M}$ |
| $[G_s]_{\alpha,GTP}^{cyt}$        | Concentration of active $G_{s\alpha}$ subunit (cytosol)                      | $0.331511 \cdot 10^{-3} \mu\text{M}$  |
| $[G_s]_{\beta\gamma}^{cyt}$       | Concentration of $G_{s\beta\gamma}$ subunit (cytosol)                        | $0.663570 \cdot 10^{-3} \mu\text{M}$  |
| $[G_s]_{\alpha,GDP}^{cyt}$        | Concentration of inactive $G_{s\alpha}$ subunit (cytosol)                    | $0.333058 \cdot 10^{-3} \mu\text{M}$  |
| $[cAMP]_{AC56}^{cav}$             | cAMP concentration produced by AC5/6 (caveolae)                              | $0.000000 \mu\text{M}$                |
| $[cAMP]_{AC47}^{ecav}$            | cAMP concentration produced by AC4/7 (extracaveolae)                         | $0.000000 \mu\text{M}$                |
| $[cAMP]_{AC56}^{cyt}$             | cAMP concentration produced by AC5/6 (cytosol)                               | $0.000000 \mu\text{M}$                |
| $[cAMP]_{AC47}^{cyt}$             | cAMP concentration produced by AC4/7 (cytosol)                               | $0.000000 \mu\text{M}$                |
| $[PDE3]_p^{cav}$                  | Concentration of phosphorylated PDE3 (caveolae)                              | $0.125103 \cdot 10^{-1} \mu\text{M}$  |
| $[PDE4]_p^{cav}$                  | Concentration of phosphorylated PDE4 (caveolae)                              | $0.580798 \cdot 10^{-2} \mu\text{M}$  |
| $[cAMP]_{PDE2}^{cav}$             | cAMP concentration degraded by PDE2 (caveolae)                               | $0.000000 \mu\text{M}$                |
| $[cAMP]_{PDE3}^{cav}$             | cAMP concentration degraded by PDE3 (caveolae)                               | $0.000000 \mu\text{M}$                |
| $[cAMP]_{PDE4}^{cav}$             | cAMP concentration degraded by PDE4 (caveolae)                               | $0.000000 \mu\text{M}$                |
| $[PDE4]_p^{ecav}$                 | Concentration of phosphorylated PDE4 (extracaveolae)                         | $0.158226 \cdot 10^{-1} \mu\text{M}$  |
| $[cAMP]_{PDE2}^{ecav}$            | cAMP concentration degraded by PDE2 (extracaveolae)                          | $0.000000 \mu\text{M}$                |
| $[cAMP]_{PDE4}^{ecav}$            | cAMP concentration degraded by PDE4 (extracaveolae)                          | $0.000000 \mu\text{M}$                |
| $[PDE3]_p^{cyt}$                  | Concentration of phosphorylated PDE3 (cytosol)                               | $0.120998 \cdot 10^{-2} \mu\text{M}$  |
| $[PDE4]_p^{cyt}$                  | Concentration of phosphorylated PDE4 (cytosol)                               | $0.373102 \cdot 10^{-2} \mu\text{M}$  |
| $[cAMP]_{PDE2}^{cyt}$             | cAMP concentration degraded by PDE2 (cytosol)                                | $0.000000 \mu\text{M}$                |

|                          |                                                                            |                                      |
|--------------------------|----------------------------------------------------------------------------|--------------------------------------|
| $[cAMP]_{PDE3}^{cyt}$    | cAMP concentration degraded by PDE3 (cytosol)                              | 0.000000 $\mu\text{M}$               |
| $[cAMP]_{PDE4}^{cyt}$    | cAMP concentration degraded by PDE4 (cytosol)                              | 0.000000 $\mu\text{M}$               |
| $[cAMP]_{PKA}^{cav}$     | cAMP concentration change due to binding to PKA (caveolae)                 | 7.92317 $\mu\text{M}$                |
| $[ARC]^{cav}$            | Concentration of PKA RC dimer with 1 cAMP molecule bound (caveolae)        | 0.299288 $\mu\text{M}$               |
| $[A_2RC]^{cav}$          | Concentration of PKA RC dimer with 2 cAMP molecules bound (caveolae)       | $0.303358 \cdot 10^{-1} \mu\text{M}$ |
| $[A_2R]^{cav}$           | Concentration of PKA R subunit with 2 cAMP molecules bound (caveolae)      | 0.858440 $\mu\text{M}$               |
| $[C]^{cav}$              | Concentration of free PKA catalytic subunit (caveolae)                     | $0.459397 \cdot 10^{-1} \mu\text{M}$ |
| $[PKIC]^{cav}$           | Concentration of PKI inactivated PKA catalytic subunit (caveolae)          | 0.823499 $\mu\text{M}$               |
| $[cAMP]_{PKA}^{ecav}$    | cAMP concentration change due to binding to PKA (extracaveolae)            | 6.74029 $\mu\text{M}$                |
| $[ARC]^{ecav}$           | Concentration of PKA RC dimer with 1 cAMP molecule bound (extracaveolae)   | 0.653988 $\mu\text{M}$               |
| $[A_2RC]^{ecav}$         | Concentration of PKA RC dimer with 2 cAMP molecules bound (extracaveolae)  | 0.132861 $\mu\text{M}$               |
| $[A_2R]^{ecav}$          | Concentration of PKA R subunit with 2 cAMP molecules bound (extracaveolae) | 1.17000 $\mu\text{M}$                |
| $[C]^{ecav}$             | Concentration of free PKA catalytic subunit (extracaveolae)                | 0.147623 $\mu\text{M}$               |
| $[PKIC]^{ecav}$          | Concentration of PKI inactivated PKA catalytic subunit (extracaveolae)     | 1.03338 $\mu\text{M}$                |
| $[cAMP]_{PKA}^{cyt}$     | cAMP concentration change due to binding to PKA (cytosol)                  | 9.32461 $\mu\text{M}$                |
| $[ARC]^{cyt}$            | Concentration of PKA RC dimer with 1 cAMP molecule bound (cytosol)         | $0.996350 \cdot 10^{-1} \mu\text{M}$ |
| $[A_2RC]^{cyt}$          | Concentration of PKA RC dimer with 2 cAMP molecules bound (cytosol)        | $0.140099 \cdot 10^{-1} \mu\text{M}$ |
| $[A_2R]^{cyt}$           | Concentration of PKA R subunit with 2 cAMP molecules bound (cytosol)       | 0.273868 $\mu\text{M}$               |
| $[C]^{cyt}$              | Concentration of free PKA catalytic subunit (cytosol)                      | $0.665022 \cdot 10^{-1} \mu\text{M}$ |
| $[PKIC]^{cyt}$           | Concentration of PKI inactivated PKA catalytic subunit (cytosol)           | 0.218365 $\mu\text{M}$               |
| $[Inhib1]_{p,tot}^{cyt}$ | Concentration of total phosphorylated PP1 inhibitor 1 (cytosol)            | $0.213571 \cdot 10^{-1} \mu\text{M}$ |
| $[cAMP]^{cav}$           | Concentration of cAMP in caveolae                                          | 0.253399 $\mu\text{M}$               |
| $[cAMP]^{ecav}$          | Concentration of cAMP in extracaveolae                                     | 0.507889 $\mu\text{M}$               |
| $[cAMP]^{cyt}$           | Concentration of cAMP in cytosol                                           | 0.407775 $\mu\text{M}$               |
